# Supplementary material
Source: publisher figshare collection journal article supplement (https://gsajournals.figshare.com/articles/dataset/_/12132924)
Supplement: Supplementary file 1 [file 2]

## Sheet: Sheet1
S5 Table: RNAseq analysis of GSY147 with and without Credit41 treatment
Systematic name	baseMean	log2FoldChange	lfcSE	stat	pvalue	padj	geneName
YBR148W	628.383	-6.05014	0.137318	-43.4847	0	0	YSW1
YCL025C	8275.27	-6.06439	0.144733	-41.7954	0	0	AGP1
YDR497C	10835.3	3.46967	0.073907	46.9409	0	0	ITR1
YER024W	843.837	-2.97604	0.0703198	-42.294	0	0	YAT2
YER069W	5755.87	-2.82567	0.067118	-42.097	0	0	ARG5,6
YER175C	1650.87	-3.54059	0.0755891	-46.8179	0	0	TMT1
YIL116W	3318.39	-2.70958	0.0525225	-51.5831	0	0	HIS5
YIL164C	1026.36	-2.73402	0.0548499	-49.8241	0	0	NIT1
YJR109C	10802.6	-2.79445	0.0466829	-59.8581	0	0	CPA2
YKL218C	631.65	-2.37661	0.0563876	-42.1243	0	0	SRY1
YMR062C	3139.74	-3.1786	0.0793157	-40.0683	0	0	ARG7
YMR096W	754.914	-5.07325	0.119064	-42.4388	0	0	SNZ1
YNL104C	12650.2	-2.31632	0.0521505	-44.4152	0	0	LEU4
YNR016C	7703.18	2.10589	0.0491083	42.8816	0	0	ACC1
YOL058W	2495	-3.55633	0.0733759	-48.4517	0	0	ARG1
YOL059W	2306.38	-1.79449	0.0424363	-42.2836	0	0	GPD2
YPL231W	8623.8	2.63442	0.0635804	41.4326	0	0	FAS2
YPL250C	8786.53	-4.58308	0.0812693	-56.3828	0	0	ATG41
YPR145W	17380	-3.29437	0.0505277	-65.1971	0	0	ASN1
YBR145W	1012.88	-4.51129	0.121287	-37.1304	9.07366e-302	2.9249e-299	ADH5
YGR157W	1413.91	2.53334	0.0702274	36.0536	1.20916e-284	3.71211e-282	CHO2
YGL180W	1058.6	-3.05294	0.0855776	-35.6559	1.90915e-278	5.59468e-276	ATG1
YKL211C	962.824	-2.54847	0.0730375	-34.88	1.49603e-266	4.19344e-264	TRP3
YNR068C	465.02	-4.2921	0.12266	-34.8727	1.92533e-266	5.17191e-264	NA
YDL223C	10400.3	-3.36286	0.096748	-34.7557	1.13658e-264	2.93101e-262	HBT1
YGL116W	1139.87	-3.28899	0.0947348	-34.6989	8.17572e-264	2.02726e-261	CDC20
YGL224C	500.925	-2.51776	0.0739404	-34.0255	9.35363e-254	2.23344e-251	SDT1
YBR256C	2015.08	-2.09047	0.0630967	-33.1277	1.18663e-240	2.73222e-238	RIB5
YKL182W	11777.3	2.31165	0.0699881	33.0288	3.13497e-239	6.96937e-237	FAS1
YJL130C	17883.4	-1.74185	0.0538179	-32.3654	8.43486e-230	1.81265e-227	URA2
YNR065C	1161.72	-2.24826	0.0701556	-32.0395	3.07494e-225	6.39487e-223	NA
YGL184C	455.484	-4.58692	0.1437	-31.7724	1.55546e-221	3.13376e-219	STR3
YJR130C	948.237	-3.04678	0.0962953	-31.6229	1.78687e-219	3.4909e-217	STR2
YHR175W	374.946	-4.01019	0.126371	-31.5777	7.46645e-219	1.41577e-216	CTR2
YBR068C	1724.99	-4.9429	0.156325	-31.3295	1.84902e-215	3.40589e-213	BAP2
YOL005C	1006.76	2.18105	0.0700389	31.1294	9.65269e-213	1.72864e-210	RPB11
YJR111C	654.93	-2.72108	0.0877997	-30.9721	1.28073e-210	2.23158e-208	PXP2
YNL300W	3995.01	3.34761	0.108888	30.7363	1.86286e-207	3.1605e-205	TOS6
YGL117W	342.789	-4.95067	0.159769	-30.7294	2.30721e-207	3.81399e-205	NA
YGR097W	1454.26	-2.03792	0.0666882	-30.5547	4.90401e-205	7.90404e-203	ASK10
YNR069C	274.404	-4.07594	0.133569	-30.3556	2.12106e-202	3.33523e-200	BSC5
YBR147W	1896.51	-3.54307	0.117863	-30.0486	2.27945e-198	3.49895e-196	RTC2
YLR183C	331.335	3.84531	0.127219	29.9438	5.29266e-197	7.92172e-195	TOS4
YPL163C	2297.97	2.3899	0.0798014	29.9431	5.40648e-197	7.92172e-195	SVS1
YOL091W	187.146	-4.58393	0.15143	-29.8069	3.18242e-195	4.55934e-193	SPO21
YNL169C	1600.19	2.09506	0.0713643	29.3523	2.23374e-189	3.13063e-187	PSD1
YGL077C	1986.01	2.21842	0.0755746	29.3499	2.39567e-189	3.28615e-187	HNM1
YDL198C	401.492	-2.42821	0.0826896	-29.3401	3.2001e-189	4.29813e-187	GGC1
YMR307W	1434.16	1.78985	0.0611804	29.2512	4.33903e-188	5.70892e-186	GAS1
YOR337W	2366.1	-2.15382	0.073854	-29.1604	6.16844e-187	7.95359e-185	TEA1
YBR248C	2120.18	-1.70933	0.0586805	-29.1273	1.62186e-186	2.05022e-184	HIS7
YJL092W	519.686	2.06439	0.0712953	28.9322	4.70509e-184	5.83341e-182	SRS2
YPL057C	1770.64	2.49096	0.0863606	28.8371	7.36431e-183	8.95806e-181	SUR1
YGL059W	249.206	-3.23037	0.111874	-28.7875	3.07427e-182	3.67033e-180	PKP2
YGL215W	3210.43	-1.60432	0.0559434	-28.6765	7.4922e-181	8.78222e-179	CLG1
YER073W	1920.81	-1.99898	0.070256	-28.4501	4.86404e-178	5.59973e-176	ALD5
YMR108W	9788.4	-1.59114	0.0560333	-28.3961	2.26175e-177	2.55816e-175	ILV2
YDR011W	2611.66	-1.26525	0.0445816	-28.3799	3.58201e-177	3.98159e-175	SNQ2
YNL311C	623.798	-1.91289	0.0676359	-28.2732	7.3749e-176	8.05864e-174	SKP2
YDR502C	2794.27	2.99114	0.106002	28.2107	4.32202e-175	4.64401e-173	SAM2
YLR237W	1186.93	-2.59552	0.0922643	-28.1096	7.46889e-174	7.89376e-172	THI7
YMR319C	927.67	-2.95354	0.106795	-27.6399	3.69509e-168	3.8423e-166	FET4
YCL030C	16847.8	-1.81393	0.0657089	-27.6053	9.6225e-168	9.84703e-166	HIS4
YOL077W-A	1632.12	1.35302	0.0492817	27.454	6.23101e-166	6.27676e-164	ATP19
YIL024C	314.989	-3.32523	0.121017	-27.4055	2.35652e-165	2.3373e-163	NA
YLR343W	299.784	-2.58988	0.094972	-27.2302	2.8551e-163	2.78892e-161	GAS2
YBR047W	189.022	-5.48924	0.195626	-27.1889	8.79061e-163	8.45867e-161	FMP23
YKL120W	1998.07	-1.21247	0.0445957	-27.1871	9.24088e-163	8.76117e-161	OAC1
YDL170W	343.179	-2.44246	0.0902468	-27.0369	5.4459e-161	5.08837e-159	UGA3
YBR054W	6048.17	-4.00931	0.148418	-27.0088	1.16403e-160	1.07207e-158	YRO2
YOR375C	4276.61	2.12416	0.0790048	26.8851	3.28184e-159	2.98e-157	GDH1
YER040W	903.447	-1.52579	0.0570098	-26.7599	9.47353e-158	8.48275e-156	GLN3
YER001W	1391.5	2.02019	0.0757637	26.66	1.37007e-156	1.20998e-154	MNN1
YOR085W	1008.84	2.08478	0.0782404	26.6378	2.48147e-156	2.16189e-154	OST3
YHR108W	1732.06	1.28112	0.0481493	26.606	5.77884e-156	4.96749e-154	GGA2
YER070W	563.827	3.95749	0.148017	26.5877	9.42779e-156	7.9975e-154	RNR1
YHR071W	1673.19	-3.1476	0.118624	-26.5254	4.94289e-155	4.13855e-153	PCL5
YNL160W	6940.96	-3.41393	0.129639	-26.3322	8.2079e-153	6.78414e-151	YGP1
YER174C	236.126	-2.76579	0.104828	-26.3276	9.27257e-153	7.56712e-151	GRX4
YKL163W	378.221	-3.80107	0.143203	-26.2944	2.22257e-152	1.79111e-150	PIR3
YBR218C	4590.53	-1.40434	0.0535612	-26.2189	1.61863e-151	1.28831e-149	PYC2
YKR001C	1567.32	1.22028	0.0465535	26.2115	1.966e-151	1.54571e-149	VPS1
YGR098C	925.775	1.6169	0.0617352	26.1856	3.87893e-151	3.01295e-149	ESP1
YHR018C	21331.2	-1.7498	0.0670018	-26.1154	2.43952e-150	1.87233e-148	ARG4
YDR158W	5494.59	-2.24894	0.0866936	-25.9399	2.36499e-148	1.79377e-146	HOM2
YGR189C	5766.15	1.60765	0.0621732	25.8571	2.02609e-147	1.51886e-145	CRH1
YPL092W	395.446	-3.00128	0.115909	-25.8565	2.05558e-147	1.52325e-145	SSU1
YOR221C	1054.12	-1.75025	0.0677305	-25.8378	3.33262e-147	2.44152e-145	MCT1
YKR066C	3714.59	-2.26454	0.0879154	-25.7565	2.72241e-146	1.97206e-144	CCP1
YBR071W	1742.89	1.80898	0.070269	25.7409	4.07933e-146	2.92216e-144	NA
YDR035W	2321.25	-2.51832	0.097955	-25.7053	1.01943e-145	7.22227e-144	ARO3
YPL265W	1161.11	-2.6919	0.105126	-25.5789	2.61688e-144	1.8338e-142	DIP5
YFR032C	192.688	-6.18809	0.224756	-25.524	1.06828e-143	7.40558e-142	RRT5
YBL101C	1882	-1.56735	0.0616341	-25.4285	1.22067e-142	8.37197e-141	ECM21
YDL182W	8859.74	-2.39013	0.0941293	-25.3912	3.15571e-142	2.14156e-140	LYS20
YOL055C	313.696	-2.83774	0.112102	-25.2221	2.29042e-140	1.53816e-138	THI20
YPL127C	272.863	3.30927	0.131353	25.0533	1.60836e-138	1.06898e-136	HHO1
YKL033W-A	1872.49	-2.09155	0.0848413	-24.6497	3.71108e-134	2.44136e-132	NA
YKL101W	1312.53	1.92409	0.0791718	24.2981	2.05395e-130	1.33756e-128	HSL1
YOL140W	1106.38	-2.05124	0.0844528	-24.284	2.8921e-130	1.86454e-128	ARG8
YER052C	731.681	-2.42572	0.100298	-24.1751	4.06302e-129	2.59349e-127	HOM3
YJR105W	1190.19	1.76432	0.0730844	24.1381	9.96798e-129	6.30035e-127	ADO1
YDR097C	671.522	2.39952	0.0998396	24.0184	1.78509e-127	1.11733e-125	MSH6
YNL135C	1298.58	2.32502	0.0968239	24.007	2.35111e-127	1.45746e-125	FPR1
YER096W	256.656	-3.27676	0.135943	-23.9631	6.75498e-127	4.14756e-125	SHC1
YDL227C	195.256	3.70049	0.153551	23.8118	2.51924e-125	1.53222e-123	HO
YDL025C	1132.11	-1.84905	0.0777442	-23.7803	5.34522e-125	3.22062e-123	RTK1
YPR117W	1904.38	-1.12339	0.0474425	-23.6786	5.99216e-124	3.57699e-122	NA
YJL187C	492.039	2.30562	0.0979622	23.5143	2.91548e-122	1.72441e-120	SWE1
YKR039W	4341.7	1.63462	0.0697506	23.4344	1.90607e-121	1.11713e-119	GAP1
YBR115C	3808.52	-1.30204	0.0558697	-23.3044	4.00462e-120	2.32593e-118	LYS2
YNL262W	567.097	2.03668	0.0879597	23.1413	1.77908e-118	1.02408e-116	POL2
YBR048W	8489.82	1.0471	0.0453727	23.0778	7.74114e-118	4.41656e-116	RPS11B
YDR127W	5049.02	-1.48071	0.064163	-23.0769	7.90903e-118	4.47277e-116	ARO1
YJL172W	3563.81	1.46264	0.0635832	23.0021	4.43774e-117	2.48783e-115	CPS1
YJL088W	363.504	-2.2669	0.0987854	-22.93	2.33294e-116	1.29659e-114	ARG3
YKL113C	328.454	2.8784	0.125629	22.857	1.24363e-115	6.79463e-114	RAD27
YGR043C	1762.8	-2.24871	0.0992085	-22.6638	1.02039e-113	5.48204e-112	NQM1
YLR056W	1723.22	1.73804	0.0769282	22.5918	5.2176e-113	2.77999e-111	ERG3
YDR242W	166.834	-3.15667	0.139145	-22.5912	5.29497e-113	2.79809e-111	AMD2
YFR055W	378.688	-2.88787	0.127801	-22.5658	9.39683e-113	4.92531e-111	IRC7
YMR076C	506.516	3.35749	0.148765	22.5143	3.00842e-112	1.56414e-110	PDS5
YKL165C	309.6	2.23202	0.0991837	22.4658	8.96373e-112	4.62313e-110	MCD4
YCL018W	1047.77	-1.53088	0.068208	-22.4421	1.52831e-111	7.81983e-110	LEU2
YOL052C-A	2029.7	-3.22193	0.143829	-22.3937	4.53643e-111	2.30286e-109	DDR2
YAL023C	2215.67	1.14091	0.0509929	22.3734	7.14829e-111	3.60039e-109	PMT2
YFL014W	20042.4	-2.43515	0.109225	-22.2948	4.15195e-110	2.07501e-108	HSP12
YDR354W	960.985	-1.66616	0.074788	-22.2749	6.47606e-110	3.21163e-108	TRP4
YDR077W	423275	-1.47536	0.066333	-22.2417	1.35625e-109	6.67461e-108	SED1
YPL061W	3114.69	2.90724	0.130935	22.2007	3.37819e-109	1.64994e-107	ALD6
YER043C	1414.23	1.88418	0.0854938	22.037	1.2731e-107	6.12514e-106	SAH1
YBL032W	1801.7	1.46793	0.0666099	22.0365	1.28715e-107	6.14684e-106	HEK2
YCR020C	411.021	-3.15611	0.142914	-22.0347	1.33906e-107	6.34773e-106	PET18
YGL094C	781.496	1.56713	0.0713093	21.9723	5.30359e-107	2.49578e-105	PAN2
YLR329W	153.125	-3.50778	0.158448	-21.9665	6.01817e-107	2.81153e-105	REC102
YIL026C	466.727	2.11296	0.097044	21.7569	5.94493e-105	2.75733e-103	IRR1
YKL216W	1088.85	2.12921	0.0978564	21.7533	6.42758e-105	2.9599e-103	URA1
YNL284C-B	3141.64	-1.39224	0.0641145	-21.714	1.51188e-104	6.91284e-103	NA
YBL003C	275.105	2.1837	0.100535	21.6868	2.73368e-104	1.24113e-102	HTA2
YPR138C	1077.3	-1.40068	0.0646589	-21.6614	4.74821e-104	2.14068e-102	MEP3
YKR069W	838.124	-2.08297	0.0961841	-21.6503	6.03623e-104	2.70247e-102	MET1
YPR167C	2121.95	-1.83778	0.0848818	-21.6491	6.20187e-104	2.75748e-102	MET16
YOL064C	1054.42	-2.08822	0.0965133	-21.6322	8.94389e-104	3.9494e-102	MET22
YNL016W	3384.36	1.16623	0.0539855	21.6025	1.70054e-103	7.45807e-102	PUB1
YMR305C	1261.6	2.75573	0.127581	21.5898	2.23853e-103	9.75123e-102	SCW10
YMR215W	389.566	2.6136	0.120998	21.5625	4.03914e-103	1.74767e-101	GAS3
YIR034C	749.939	-2.2877	0.10642	-21.4893	1.95876e-102	8.41875e-101	LYS1
YEL061C	825.049	1.4972	0.0698485	21.4298	7.0535e-102	3.01152e-100	CIN8
YDL100C	1476.5	1.12559	0.0528571	21.2941	1.28865e-100	5.46572e-99	GET3
YLR272C	266.925	2.38342	0.111715	21.2918	1.35326e-100	5.70227e-99	YCS4
YLR347C	824.819	1.37317	0.0644971	21.2885	1.45084e-100	6.07374e-99	KAP95
YBR240C	169.762	-2.31005	0.108296	-21.2634	2.47741e-100	1.03044e-98	THI2
YDR225W	8224.48	1.60429	0.0754919	21.2507	3.24934e-100	1.34285e-98	HTA1
YML076C	1041.41	-1.2161	0.0577238	-21.066	1.6327e-98	6.66204e-97	WAR1
YNL087W	941.6	1.56896	0.0744689	21.0645	1.68519e-98	6.83296e-97	TCB2
YHR047C	686.675	-1.62014	0.0769296	-21.0554	2.04199e-98	8.22795e-97	AAP1
YBL043W	535.49	-1.70529	0.0812836	-20.9731	1.15525e-97	4.62604e-96	ECM13
YML106W	1421.28	1.54985	0.0739623	20.953	1.76166e-97	7.01074e-96	URA5
YER176W	1134.78	-1.54666	0.0741306	-20.8616	1.19683e-96	4.73373e-95	ECM32
YKL161C	629.205	-1.53459	0.0736432	-20.8337	2.14102e-96	8.41656e-95	KDX1
YGL148W	1634.57	-1.50531	0.072278	-20.8252	2.56049e-96	1.00045e-94	ARO2
YJL071W	179.524	-2.2915	0.109905	-20.8105	3.47403e-96	1.34922e-94	ARG2
YPL058C	1579.82	-1.59861	0.0768372	-20.8039	3.99037e-96	1.54048e-94	PDR12
YLR045C	405.405	2.8015	0.135032	20.7122	2.68803e-95	1.02543e-93	STU2
YAL021C	2147.41	1.02031	0.0495044	20.6105	2.20884e-94	8.37671e-93	CCR4
YML085C	545.635	1.70261	0.0825748	20.61	2.23117e-94	8.41191e-93	TUB1
YLR153C	3754.51	1.3588	0.0659316	20.6091	2.27478e-94	8.52647e-93	ACS2
YBR208C	930.031	1.27957	0.0621855	20.5733	4.76098e-94	1.77422e-92	DUR1,2
YLR348C	547.019	1.76324	0.0860386	20.4851	2.92627e-93	1.08423e-91	DIC1
YOL107W	384.038	1.99932	0.0977744	20.4295	9.14794e-93	3.3701e-91	NA
YOR326W	2175.12	1.1017	0.0540092	20.3976	1.75728e-92	6.43702e-91	MYO2
YCL024W	309.34	2.70825	0.132481	20.3961	1.81026e-92	6.59363e-91	KCC4
YBL103C	917.56	-1.56906	0.0771001	-20.3481	4.8311e-92	1.74978e-90	RTG3
YNL290W	455.799	1.39261	0.0686283	20.2835	1.79797e-91	6.4757e-90	RFC3
YNL125C	1729.52	-1.30539	0.0648179	-20.1387	3.37813e-90	1.20993e-88	ESBP6
YOR239W	1183.84	1.54378	0.076777	20.1049	6.67926e-90	2.37907e-88	ABP140
YJR025C	680.301	-1.72109	0.0859876	-20.0111	4.41147e-89	1.56268e-87	BNA1
YBR106W	556.234	1.41234	0.0706254	19.9931	6.32308e-89	2.22759e-87	PHO88
YPL075W	993.627	-1.43741	0.0719369	-19.9795	8.29869e-89	2.9077e-87	GCR1
YPR036W-A	17406.8	-2.06805	0.103534	-19.9739	9.29718e-89	3.23994e-87	SPO24
YBR078W	812.582	2.24182	0.112571	19.9067	3.55856e-88	1.23344e-86	ECM33
YER003C	2502.52	2.28387	0.114922	19.8711	7.2335e-88	2.49382e-86	PMI40
YJL074C	402.934	2.73021	0.13748	19.8299	1.64387e-87	5.63726e-86	SMC3
YOR303W	3367.19	-1.72252	0.0869261	-19.815	2.21132e-87	7.54307e-86	CPA1
YGR032W	2620.7	1.28311	0.0649408	19.7584	6.7944e-87	2.30545e-85	GSC2
YDR084C	643.361	1.21852	0.0618156	19.7094	1.78923e-86	6.03937e-85	TVP23
YER026C	1109.88	2.55582	0.129665	19.7042	1.98419e-86	6.66255e-85	CHO1
YML116W	252.231	-2.208	0.112173	-19.6618	4.58027e-86	1.53e-84	ATR1
YJL076W	1332.07	1.00667	0.0512501	19.6412	6.87092e-86	2.28334e-84	NET1
YGL055W	1726.04	2.11908	0.108179	19.5881	1.95389e-85	6.45988e-84	OLE1
YPL190C	1680.41	1.48428	0.0758009	19.5798	2.2987e-85	7.56107e-84	NAB3
YCR034W	190.574	2.29859	0.117294	19.5282	6.32559e-85	2.07011e-83	ELO2
YNL065W	1916.61	-1.38529	0.0709786	-19.5164	7.97102e-85	2.59541e-83	AQR1
YDL003W	434.563	3.38614	0.173284	19.491	1.3101e-84	4.24432e-83	MCD1
YHR046C	182.135	-2.25181	0.115837	-19.4051	6.98957e-84	2.25309e-82	INM1
YDR432W	4400.27	1.4259	0.0736005	19.3733	1.29639e-83	4.15813e-82	NPL3
YLR406C	1184.79	1.05964	0.0547077	19.3681	1.43503e-83	4.58001e-82	RPL31B
YDL054C	149.594	-2.06949	0.106848	-19.3327	2.85176e-83	9.05678e-82	MCH1
YOR176W	1048.49	1.86239	0.0964588	19.3058	4.79753e-83	1.51616e-81	HEM15
YPL270W	768.894	-1.00385	0.0520101	-19.3	5.37548e-83	1.69052e-81	MDL2
YOR372C	1211.06	1.03007	0.0533799	19.2956	5.84843e-83	1.83033e-81	NDD1
YIL117C	302.625	-2.58196	0.134063	-19.236	1.85063e-82	5.76379e-81	PRM5
YBR072W	11365.4	-2.92588	0.152682	-19.1646	7.31854e-82	2.2684e-80	HSP26
YBL002W	8197.62	2.20523	0.115449	19.1006	2.49723e-81	7.70318e-80	HTB2
YGR286C	611.913	2.47396	0.129527	19.0872	3.22413e-81	9.89807e-80	BIO2
YJL190C	6949.14	1.15204	0.0603864	19.0776	3.87313e-81	1.18341e-79	RPS22A
YGL173C	2957.92	1.18326	0.0620814	19.0599	5.43838e-81	1.65383e-79	XRN1
YHR172W	214.076	2.66405	0.139459	19.0357	8.62622e-81	2.61095e-79	SPC97
YLR180W	1386.96	1.57113	0.0828782	18.9559	3.94613e-80	1.18882e-78	SAM1
YLR133W	280.785	1.92634	0.101536	18.9482	4.57195e-80	1.37095e-78	CKI1
YOR130C	180.639	-2.89504	0.152381	-18.9457	4.78966e-80	1.42958e-78	ORT1
YDR377W	1680.37	1.45281	0.0767538	18.9285	6.64461e-80	1.97409e-78	ATP17
YOR044W	898.273	-1.44437	0.0764758	-18.8846	1.52609e-79	4.51316e-78	IRC23
YBR092C	270.028	-2.97381	0.156136	-18.8565	2.59956e-79	7.65268e-78	PHO3
YBR166C	141.412	-2.02493	0.10736	-18.8248	4.72635e-79	1.38504e-77	TYR1
YNL102W	521.723	2.71349	0.144657	18.7385	2.4047e-78	7.01499e-77	POL1
YCL014W	1010.85	1.30129	0.0695082	18.7192	3.45228e-78	1.00256e-76	BUD3
YER118C	936.935	1.55868	0.083441	18.6776	7.53628e-78	2.17876e-76	SHO1
YER110C	4203.7	1.33726	0.0715979	18.6772	7.58608e-78	2.18337e-76	KAP123
YPL083C	416.715	1.40179	0.0751336	18.6507	1.24745e-77	3.57436e-76	SEN54
YHR183W	1542.79	1.3847	0.0742762	18.642	1.46712e-77	4.18519e-76	GND1
YJR148W	381.568	-1.48715	0.0797845	-18.6337	1.71361e-77	4.8668e-76	BAT2
YNL103W	1499.4	-1.03404	0.0557604	-18.5436	9.18838e-77	2.59813e-75	MET4
YBL033C	481.086	-1.53784	0.0830748	-18.5069	1.81821e-76	5.11878e-75	RIB1
YBR012W-B	2085.28	-1.61641	0.0873745	-18.4989	2.10884e-76	5.91117e-75	NA
YBR043C	1220.42	-1.62228	0.0877751	-18.4805	2.96611e-76	8.27815e-75	QDR3
YKR013W	1810	2.23686	0.121027	18.4799	2.99468e-76	8.32186e-75	PRY2
YDL095W	2088.63	1.1645	0.0630613	18.4659	3.88375e-76	1.07461e-74	PMT1
YDR500C	3284.4	1.25348	0.0678902	18.4631	4.09019e-76	1.1269e-74	RPL37B
YGL219C	662.519	-1.45151	0.0786413	-18.4545	4.7971e-76	1.31604e-74	MDM34
YOR134W	326.245	-3.20761	0.173366	-18.4536	4.8796e-76	1.333e-74	BAG7
YDR216W	378.669	-2.15917	0.117134	-18.4198	9.11216e-76	2.47874e-74	ADR1
YLR103C	152.388	2.7584	0.14935	18.3702	2.27404e-75	6.15998e-74	CDC45
YJR031C	672.282	1.21855	0.0663363	18.3667	2.42947e-75	6.55348e-74	GEA1
YLL048C	3370.67	-1.63402	0.0890743	-18.3439	3.69031e-75	9.9131e-74	YBT1
YDR508C	1237.75	-2.78752	0.152139	-18.3144	6.34997e-75	1.69868e-73	GNP1
YNL312W	333.654	1.98277	0.108634	18.2356	2.69082e-74	7.16848e-73	RFA2
YHR162W	1301.14	-2.17878	0.119529	-18.2245	3.30104e-74	8.75794e-73	MPC2
YMR199W	286.374	2.47895	0.135743	18.2238	3.34184e-74	8.82985e-73	CLN1
YGL114W	487.241	-1.23717	0.0679869	-18.194	5.76139e-74	1.51607e-72	NA
YDR258C	2329.43	-2.86265	0.157309	-18.1933	5.82966e-74	1.5278e-72	HSP78
YHR161C	1694.19	-1.29617	0.0714885	-18.1303	1.83665e-73	4.79387e-72	YAP1801
YBR105C	2933.09	-1.24666	0.069499	-17.9377	5.99116e-72	1.55121e-70	VID24
YEL046C	874.687	-1.5908	0.0887674	-17.9189	8.39262e-72	2.16429e-70	GLY1
YHR214C-B	9244.06	-1.29658	0.0724447	-17.8972	1.23891e-71	3.18218e-70	NA
YCL008C	1011.77	-1.22221	0.0683974	-17.8679	2.09646e-71	5.36344e-70	STP22
YIR031C	401.626	1.56799	0.0877454	17.8588	2.4693e-71	6.29232e-70	DAL7
YOL007C	425.504	2.62313	0.146676	17.8574	2.53021e-71	6.42216e-70	CSI2
YJL173C	259.455	2.62915	0.146895	17.8558	2.60603e-71	6.58866e-70	RFA3
YGL137W	2169.22	1.1464	0.0643038	17.8279	4.29522e-71	1.08169e-69	SEC27
YNL221C	1168.66	-1.37201	0.0771871	-17.7736	1.13255e-70	2.83005e-69	POP1
YDL055C	2585.11	1.58584	0.0892738	17.7633	1.35926e-70	3.38346e-69	PSA1
YHR024C	698.521	-1.03939	0.058816	-17.6703	7.09574e-70	1.75273e-68	MAS2
YJL213W	157.444	-2.84693	0.160716	-17.6591	8.65344e-70	2.12934e-68	NA
YMR019W	320.64	-1.21094	0.0687125	-17.6181	1.78944e-69	4.36989e-68	STB4
YDR341C	913.824	-1.23173	0.0699329	-17.6117	2.00454e-69	4.8767e-68	NA
YOL040C	16982.6	1.00458	0.0570448	17.6103	2.05187e-69	4.97309e-68	RPS15
YPR120C	109.282	2.89464	0.162669	17.6069	2.18127e-69	5.26691e-68	CLB5
YNL289W	915.132	3.12628	0.177544	17.5928	2.79768e-69	6.73009e-68	PCL1
YDR507C	759.366	2.32785	0.13277	17.5245	9.31285e-69	2.2237e-67	GIN4
YML008C	882.215	1.40556	0.0802372	17.5157	1.08733e-68	2.58672e-67	ERG6
YJL080C	932.663	1.03002	0.0588095	17.5137	1.12594e-68	2.66872e-67	SCP160
YJL186W	1338.22	1.4621	0.0837563	17.4563	3.0806e-68	7.27495e-67	MNN5
YMR144W	240.647	1.89654	0.108539	17.4494	3.47969e-68	8.18743e-67	FDO1
YCL009C	1769.41	-1.46935	0.084238	-17.4418	3.97337e-68	9.31503e-67	ILV6
YMR042W	547.443	-1.38955	0.0797035	-17.4311	4.7931e-68	1.11961e-66	ARG80
YGL186C	376.534	-1.26494	0.0725694	-17.4261	5.22507e-68	1.2161e-66	TPN1
YHR149C	326.89	1.90489	0.109599	17.3659	1.49445e-67	3.46571e-66	SKG6
YML012W	4153.35	1.20913	0.0696459	17.361	1.62824e-67	3.76246e-66	ERV25
YHR154W	567.886	2.91294	0.167609	17.3595	1.67063e-67	3.84663e-66	RTT107
YIL056W	1056.41	-1.99647	0.11504	-17.3516	1.91871e-67	4.40211e-66	VHR1
YML021C	250.66	1.5959	0.092074	17.317	3.50407e-67	8.01091e-66	UNG1
YNL130C	1011.61	1.62812	0.0940798	17.304	4.38625e-67	9.99227e-66	CPT1
YKR034W	512.913	1.49763	0.0865183	17.2997	4.72772e-67	1.07323e-65	DAL80
YOL020W	351.782	-2.21322	0.127692	-17.2955	5.08827e-67	1.15102e-65	TAT2
YDL018C	170.749	2.4817	0.143391	17.2382	1.37295e-66	3.09491e-65	ERP3
YPR149W	7007.14	-1.98686	0.115283	-17.2343	1.46789e-66	3.29738e-65	NCE102
YPL188W	435.418	-1.65112	0.0961643	-17.1641	4.93254e-66	1.10417e-64	POS5
YJL200C	2542.48	-1.09118	0.0636389	-17.146	6.73352e-66	1.50211e-64	ACO2
YFR030W	4917.5	-1.24122	0.0723981	-17.1441	6.95166e-66	1.54543e-64	MET10
YDL181W	759.1	1.49998	0.0875153	17.1393	7.55417e-66	1.6736e-64	INH1
YIL123W	634.81	1.31673	0.0768076	17.1387	7.6319e-66	1.68503e-64	SIM1
YDR481C	570.058	-1.31855	0.0769891	-17.1239	9.85017e-66	2.16737e-64	PHO8
YHR117W	1024.75	1.10101	0.0643292	17.115	1.14727e-65	2.5158e-64	TOM71
YDR055W	4610.07	-1.98848	0.116365	-17.0882	1.8184e-65	3.97398e-64	PST1
YPL201C	86.4582	-2.78876	0.163213	-16.9741	1.27799e-64	2.76483e-63	YIG1
YPL135W	714.098	-1.24608	0.0734928	-16.9534	1.81791e-64	3.91975e-63	ISU1
YGR197C	218.019	-1.84924	0.109075	-16.9387	2.33399e-64	5.01574e-63	SNG1
YJL158C	921.67	1.98473	0.117701	16.8581	9.15379e-64	1.96061e-62	CIS3
YHR208W	4199.66	-1.28932	0.0765916	-16.8334	1.38872e-63	2.9646e-62	BAT1
YAL048C	339.62	-1.38144	0.0820476	-16.8318	1.42812e-63	3.03865e-62	GEM1
YNL126W	464.188	1.19834	0.0712633	16.8103	2.05045e-63	4.34843e-62	SPC98
YNR019W	1340.5	1.16839	0.0695492	16.7991	2.47911e-63	5.24026e-62	ARE2
YOL076W	385.128	1.36077	0.0810894	16.7748	3.72943e-63	7.85739e-62	MDM20
YKL029C	4459.34	-1.62253	0.0967449	-16.7707	4.00036e-63	8.37347e-62	MAE1
YAL024C	481.631	1.25846	0.0750605	16.761	4.70252e-63	9.81138e-62	LTE1
YBR162W-A	833.342	1.35855	0.0811698	16.7337	7.44244e-63	1.54779e-61	YSY6
YOR073W	125.687	2.19675	0.130948	16.705	1.20473e-62	2.4974e-61	SGO1
YKL045W	122.025	2.25532	0.134487	16.6922	1.49444e-62	3.08803e-61	PRI2
YFR031C-A	1234.27	1.40924	0.0844499	16.6871	1.62714e-62	3.35149e-61	RPL2A
YER081W	666.202	-2.16869	0.129975	-16.6794	1.84988e-62	3.79815e-61	SER3
YJR154W	499.028	-1.72495	0.103566	-16.6501	3.0186e-62	6.17806e-61	NA
YGR138C	1729.97	-1.4958	0.0899501	-16.6284	4.3414e-62	8.85727e-61	TPO2
YBR245C	1369.26	1.20034	0.0722761	16.6068	6.2277e-62	1.26656e-60	ISW1
YBR117C	973.965	-2.60696	0.157413	-16.5557	1.45593e-61	2.95168e-60	TKL2
YER090W	316.48	-1.72617	0.104403	-16.5253	2.41197e-61	4.8746e-60	TRP2
YJL019W	427.31	1.3247	0.0801898	16.5139	2.91664e-61	5.87613e-60	MPS3
YGL225W	599.398	1.57548	0.0954259	16.5058	3.33108e-61	6.69017e-60	VRG4
YKR091W	591.622	-1.52644	0.0925326	-16.4918	4.20017e-61	8.40946e-60	SRL3
YKR093W	659.1	-2.05228	0.124935	-16.4229	1.31071e-60	2.61614e-59	PTR2
YPL256C	777.334	2.79519	0.17071	16.3631	3.51075e-60	6.98574e-59	CLN2
YAR007C	202.059	1.87914	0.115364	16.2616	1.84719e-59	3.65302e-58	RFA1
YJL026W	3288.82	1.24829	0.0769411	16.2241	3.40687e-59	6.69637e-58	RNR2
YCL061C	471.112	2.02187	0.124647	16.2114	4.19208e-59	8.2147e-58	MRC1
YLR134W	7100.13	-4.78778	0.295879	-16.1902	5.91246e-59	1.15508e-57	PDC5
YNL128W	95.9448	-2.89261	0.177653	-16.1871	6.22266e-59	1.21201e-57	TEP1
YIR039C	112.252	-3.36702	0.205806	-16.1716	8.00427e-59	1.55432e-57	YPS6
YNL088W	774.2	1.89472	0.117377	16.1373	1.39407e-58	2.69897e-57	TOP2
YCR073C	209.947	-1.4688	0.090984	-16.1326	1.50531e-58	2.90561e-57	SSK22
YKR058W	374.935	-1.6453	0.102594	-16.0314	7.71786e-58	1.48086e-56	GLG1
YHR128W	397.301	1.79743	0.112243	16.0065	1.15016e-57	2.20033e-56	FUR1
YBR229C	1779.55	1.04173	0.0651058	16.0012	1.25373e-57	2.39136e-56	ROT2
YHR139C	361.093	-2.86485	0.177281	-15.9914	1.46687e-57	2.78965e-56	SPS100
YHR209W	132.598	-2.1187	0.132235	-15.9894	1.51544e-57	2.87354e-56	CRG1
YJR143C	779.275	1.38058	0.0863486	15.9869	1.57638e-57	2.97161e-56	PMT4
YLL031C	583.84	1.18966	0.0744048	15.9871	1.5728e-57	2.97161e-56	GPI13
YMR195W	662.106	-1.90078	0.119084	-15.9578	2.5157e-57	4.72849e-56	ICY1
YOR074C	154.605	3.06137	0.191133	15.9059	5.76984e-57	1.08134e-55	CDC21
YJR096W	1573.79	-1.73821	0.109414	-15.8865	7.85481e-57	1.46782e-55	NA
YOR355W	1150.94	-1.04871	0.0660259	-15.8827	8.34854e-57	1.55558e-55	GDS1
YNR043W	472.187	1.28327	0.0808989	15.8599	1.20167e-56	2.23261e-55	MVD1
YDR238C	1072.29	1.05026	0.0664033	15.8166	2.39213e-56	4.43163e-55	SEC26
YOR320C	387.303	1.42434	0.0902733	15.7734	4.74239e-56	8.73547e-55	GNT1
YPR135W	352.751	1.53895	0.0977931	15.7297	9.45945e-56	1.73253e-54	CTF4
YLR004C	223.025	-3.4035	0.215466	-15.7247	1.02479e-55	1.87162e-54	THI73
YIL036W	644.535	-1.15915	0.0737425	-15.7175	1.14844e-55	2.08563e-54	CST6
YDL155W	421.619	1.1667	0.0744138	15.675	2.24222e-55	4.06056e-54	CLB3
YIL023C	236.895	-1.69877	0.108378	-15.6633	2.69443e-55	4.86583e-54	YKE4
YPL264C	87.4142	-2.77451	0.176152	-15.6593	2.86868e-55	5.16603e-54	NA
YPL214C	316.396	-1.68762	0.107765	-15.6496	3.34348e-55	6.00429e-54	THI6
YCR023C	573.669	-1.14827	0.0734219	-15.6374	4.04859e-55	7.25035e-54	NA
YOR051C	616.205	1.13281	0.0725327	15.6156	5.69962e-55	1.01788e-53	ETT1
YLL028W	1693.15	-1.00989	0.0650069	-15.535	2.0122e-54	3.57373e-53	TPO1
YJR074W	308.873	1.7024	0.110114	15.4506	7.4761e-54	1.32413e-52	MOG1
YOL019W	754.085	1.34546	0.0870893	15.4472	7.88363e-54	1.39249e-52	NA
YNL267W	513.036	1.20701	0.0782646	15.4193	1.21415e-53	2.13869e-52	PIK1
YOL119C	303.966	-2.55878	0.165772	-15.4164	1.26947e-53	2.23004e-52	MCH4
YER023W	1103.03	1.0887	0.0707169	15.3948	1.77502e-53	3.10966e-52	PRO3
YML036W	210.355	1.63087	0.105963	15.3728	2.49279e-53	4.35529e-52	CGI121
YNL246W	289.852	1.27937	0.0832802	15.3552	3.26679e-53	5.69217e-52	VPS75
YGL097W	356.72	1.19284	0.0776612	15.3543	3.31433e-53	5.75943e-52	SRM1
YNL273W	236.824	1.92928	0.125539	15.3495	3.56703e-53	6.1819e-52	TOF1
YGR060W	910.238	1.15633	0.0754209	15.3321	4.666e-53	8.06479e-52	ERG25
YJL159W	103197	-1.11289	0.0726315	-15.3224	5.41513e-53	9.33458e-52	HSP150
YDR046C	829.731	-3.10508	0.197844	-15.2918	8.66642e-53	1.48993e-51	BAP3
YNL233W	723.104	1.20204	0.0787523	15.2618	1.37363e-52	2.35527e-51	BNI4
YPR157W	1098.48	-2.14524	0.140569	-15.2574	1.4701e-52	2.51398e-51	TDA6
YFL028C	325.131	-1.6837	0.110351	-15.2504	1.6355e-52	2.78943e-51	CAF16
YNL082W	183.573	1.79407	0.117546	15.2394	1.93498e-52	3.29151e-51	PMS1
YDR126W	176.931	-1.60721	0.10563	-15.2021	3.42719e-52	5.81449e-51	SWF1
YCR053W	1818.44	-1.21153	0.0797427	-15.1924	3.97094e-52	6.71933e-51	THR4
YIL165C	48.5101	-2.97437	0.193211	-15.187	4.30881e-52	7.27197e-51	NA
YGR161C	1619.02	-2.42601	0.15999	-15.1609	6.41912e-52	1.08052e-50	RTS3
YBR249C	2359.87	-2.36891	0.156344	-15.1492	7.67067e-52	1.28783e-50	ARO4
YGR144W	568.881	-4.55464	0.275093	-15.1489	7.70069e-52	1.28952e-50	THI4
YAL007C	396.648	1.47281	0.097269	15.1368	9.26163e-52	1.54688e-50	ERP2
YGR154C	178.849	-2.06098	0.136612	-15.0651	2.74575e-51	4.57413e-50	GTO1
YGR288W	203.518	-1.3985	0.0928909	-15.0463	3.65353e-51	6.0707e-50	MAL13
YBR073W	540.234	1.32238	0.0878723	15.0456	3.68918e-51	6.11417e-50	RDH54
YLR152C	734.238	-1.80924	0.120402	-15.0237	5.1321e-51	8.48375e-50	NA
YER111C	706.165	1.28991	0.0858957	15.0151	5.84306e-51	9.63433e-50	SWI4
YKL127W	204.507	1.76144	0.117382	14.9861	9.05771e-51	1.48967e-49	PGM1
YEL042W	671.461	1.23188	0.0823938	14.9499	1.55981e-50	2.55231e-49	GDA1
YEL055C	924.185	1.31932	0.0883183	14.9368	1.89758e-50	3.08932e-49	POL5
YDR325W	398.762	1.56308	0.104607	14.9358	1.92851e-50	3.13176e-49	YCG1
YPL065W	470.274	1.33632	0.0898545	14.8683	5.29144e-50	8.57134e-49	VPS28
YPR158W-B	4208.36	-1.24358	0.0836631	-14.8639	5.65096e-50	9.13076e-49	NA
YGR254W	7658.78	-1.92363	0.129476	-14.8575	6.21896e-50	1.00234e-48	ENO1
YDL164C	160.4	1.80976	0.121962	14.811	1.24293e-49	1.99829e-48	CDC9
YOR188W	1032.87	1.26199	0.085497	14.7592	2.68583e-49	4.29666e-48	MSB1
YGL066W	1012.16	-1.15243	0.0784937	-14.6807	8.57178e-49	1.3645e-47	SGF73
YLR413W	517.361	2.23737	0.152468	14.6674	1.04303e-48	1.65627e-47	INA1
YCL010C	345.492	-1.40467	0.0962396	-14.5907	3.22067e-48	5.08913e-47	SGF29
YKR059W	4271.09	1.08514	0.0744972	14.5663	4.60448e-48	7.25796e-47	TIF1
YNR022C	213.23	1.35249	0.0930113	14.5299	7.83837e-48	1.23254e-46	MRPL50
YMR104C	324.332	-2.2497	0.154966	-14.5058	1.11362e-47	1.74684e-46	YPK2
YML061C	307.128	1.43628	0.0989959	14.5012	1.18964e-47	1.86156e-46	PIF1
YBR085C-A	960.319	-1.80952	0.12505	-14.4688	1.90807e-47	2.97853e-46	NA
YLL027W	312.79	-1.26499	0.0874064	-14.4684	1.91893e-47	2.98825e-46	ISA1
YDR070C	3318.95	-1.73233	0.119894	-14.4503	2.49677e-47	3.87872e-46	FMP16
YNL139C	1292.94	1.29275	0.0897354	14.4056	4.76909e-47	7.37322e-46	THO2
YPR188C	277.401	1.35068	0.0938049	14.3922	5.79441e-47	8.93697e-46	MLC2
YKR046C	464.404	-1.36632	0.0950829	-14.368	8.21997e-47	1.26478e-45	PET10
YKR010C	127.568	1.82787	0.127077	14.346	1.12849e-46	1.72812e-45	TOF2
YDL085C-A	749.909	1.47962	0.103147	14.342	1.19597e-46	1.82711e-45	NA
YKL151C	927.973	-1.61924	0.1129	-14.3413	1.20734e-46	1.84013e-45	NNR2
YJR118C	1095.16	1.43847	0.10038	14.3293	1.43584e-46	2.18323e-45	ILM1
YMR246W	796.485	1.43322	0.100137	14.3131	1.8131e-46	2.75036e-45	FAA4
YGR143W	2040.07	-1.23052	0.0864589	-14.2322	5.78589e-46	8.75625e-45	SKN1
YER095W	327.911	2.03088	0.143448	14.1457	1.98462e-45	2.99645e-44	RAD51
YNL004W	876.395	-1.29017	0.0912236	-14.1411	2.11829e-45	3.1908e-44	HRB1
YPR018W	412.593	1.37362	0.0971899	14.1287	2.52813e-45	3.79043e-44	RLF2
YPL124W	135.368	1.62993	0.115182	14.1223	2.76763e-45	4.13989e-44	SPC29
YGL200C	668.946	1.15909	0.0822879	14.085	4.69399e-45	7.00513e-44	EMP24
YGL248W	1040.58	-1.5136	0.107531	-14.0746	5.43778e-45	8.09639e-44	PDE1
YLR437C	210.913	1.45446	0.103367	14.058	6.87979e-45	1.02198e-43	DIF1
YJR152W	100.29	1.92254	0.136335	14.0543	7.2494e-45	1.07441e-43	DAL5
YFL037W	1153.59	1.04745	0.0745277	14.0536	7.31937e-45	1.08229e-43	TUB2
YDL174C	1673.94	1.17593	0.0842665	13.9555	2.91316e-44	4.28793e-43	DLD1
YJR076C	1131.61	1.13654	0.0814923	13.9454	3.35357e-44	4.92494e-43	CDC11
YBL085W	985.831	1.12369	0.0806187	13.9368	3.78308e-44	5.53051e-43	BOI1
YNL030W	165.301	1.72277	0.123412	13.9357	3.84269e-44	5.60493e-43	HHF2
YCR101C	422.548	-1.46131	0.105169	-13.8903	7.24811e-44	1.05244e-42	NA
YJL107C	325.218	-1.60265	0.115334	-13.8901	7.27372e-44	1.05379e-42	NA
YIR017C	508.682	-2.22697	0.160257	-13.8882	7.46448e-44	1.07659e-42	MET28
YNR066C	132.586	-2.11355	0.152015	-13.8766	8.78516e-44	1.26424e-42	NA
YBR045C	75.4181	-2.35468	0.169201	-13.8505	1.26251e-43	1.80474e-42	GIP1
YOR204W	3534.4	-1.00554	0.0726116	-13.8485	1.29929e-43	1.85322e-42	DED1
YLR290C	169.821	-1.74714	0.126182	-13.8329	1.61313e-43	2.29578e-42	COQ11
YDR256C	34.86	-3.67627	0.254521	-13.8162	2.034e-43	2.88202e-42	CTA1
YDL020C	645.736	-1.16554	0.084405	-13.8079	2.28484e-43	3.23035e-42	RPN4
YER150W	1050.1	-1.93914	0.140448	-13.807	2.31299e-43	3.25585e-42	SPI1
YPR053C	637.184	1.1327	0.0820871	13.7972	2.64909e-43	3.72084e-42	NA
YNL181W	300.905	1.34066	0.0971784	13.79	2.92827e-43	4.10404e-42	PBR1
YAR002C-A	1330.32	1.56777	0.114162	13.7317	6.56198e-43	9.17681e-42	ERP1
YKL065C	1107.23	-1.25487	0.0914019	-13.7284	6.8614e-43	9.57478e-42	YET1
YGL026C	8299.49	-1.06345	0.0778096	-13.6672	1.59324e-42	2.20894e-41	TRP5
YIL053W	6457.4	-1.01212	0.0743834	-13.6068	3.65099e-42	5.05105e-41	GPP1
YCR012W	5231.31	-1.47281	0.108532	-13.5702	6.01272e-42	8.28291e-41	PGK1
YLR154C	116.252	1.79602	0.132057	13.5643	6.52348e-42	8.96736e-41	RNH203
YMR090W	330.89	-1.71191	0.126442	-13.5348	9.74741e-42	1.33422e-40	NA
YDR440W	356.064	1.06982	0.0792717	13.4908	1.77151e-41	2.41969e-40	DOT1
YKR101W	160.831	-1.3321	0.0987811	-13.4763	2.15542e-41	2.93784e-40	SIR1
YOR276W	536.186	1.13306	0.0841904	13.4563	2.82595e-41	3.83555e-40	CAF20
YJR016C	3609.81	-1.01893	0.075922	-13.4205	4.58433e-41	6.19605e-40	ILV3
YOR242C	53.9485	-2.51212	0.18562	-13.4158	4.88821e-41	6.59294e-40	SSP2
YER054C	459.659	-2.67587	0.199575	-13.3981	6.20216e-41	8.34767e-40	GIP2
YPL273W	173.237	-2.02196	0.151354	-13.3422	1.31538e-40	1.76305e-39	SAM4
YBR156C	282.808	1.11627	0.0836441	13.339	1.37375e-40	1.83746e-39	SLI15
YDR344C	202.161	-2.65174	0.198695	-13.3183	1.81254e-40	2.41935e-39	NA
YAL005C	13822	-1.42243	0.106852	-13.3126	1.95582e-40	2.6052e-39	SSA1
YJL073W	286.028	1.38778	0.104352	13.2925	2.56024e-40	3.40328e-39	JEM1
YLR094C	309.905	-1.27516	0.0961489	-13.2596	3.96927e-40	5.2654e-39	GIS3
YKR005C	63.2675	-2.31854	0.173683	-13.2576	4.07577e-40	5.39558e-39	NA
YDR113C	317.576	2.4027	0.181155	13.2455	4.78931e-40	6.31424e-39	PDS1
YBR088C	68.1039	3.52192	0.255489	13.2084	7.84651e-40	1.03238e-38	POL30
YGR088W	1163.98	-2.58028	0.195765	-13.1833	1.09484e-39	1.43752e-38	CTT1
YGR124W	2277.95	-1.0446	0.0792356	-13.1832	1.09704e-39	1.43752e-38	ASN2
YPL017C	91.6068	-2.21549	0.167378	-13.1731	1.25328e-39	1.63892e-38	IRC15
YOR302W	1045.82	-1.93704	0.147024	-13.1715	1.27968e-39	1.67006e-38	NA
YKR103W	274.236	-1.17785	0.0895195	-13.154	1.614e-39	2.09787e-38	NFT1
YLR155C	1636.07	1.57287	0.119604	13.1473	1.76343e-39	2.28289e-38	ASP3-1
YML016C	1819.77	-1.12337	0.0854528	-13.1457	1.80169e-39	2.32775e-38	PPZ1
YJL052W	2509.08	-1.63412	0.124489	-13.1271	2.30379e-39	2.96458e-38	TDH1
YLR063W	215.73	-1.6543	0.126182	-13.1018	3.214e-39	4.12762e-38	BMT6
YBR084W	808.301	1.08672	0.0829784	13.0965	3.44796e-39	4.41929e-38	MIS1
YER055C	5357.94	-1.10474	0.0844018	-13.0887	3.81917e-39	4.88536e-38	HIS1
YJR032W	264.861	1.31134	0.100153	13.0875	3.87935e-39	4.95251e-38	CPR7
YGR146C	195.843	-1.52431	0.116506	-13.072	4.75963e-39	6.05234e-38	ECL1
YMR117C	156.439	1.66796	0.127478	13.0639	5.29404e-39	6.71864e-38	SPC24
YER037W	670.001	-2.18793	0.167561	-13.0543	6.00451e-39	7.5904e-38	PHM8
YNL071W	1896.07	1.04352	0.0799671	13.05	6.35577e-39	8.01872e-38	LAT1
YHR216W	639.133	-1.51259	0.116392	-12.9923	1.3535e-38	1.7043e-37	IMD2
YNL240C	269.834	-1.48554	0.114398	-12.9798	1.59216e-38	2.0009e-37	NAR1
YBR104W	359.238	-1.33449	0.10285	-12.9707	1.7938e-38	2.24992e-37	YMC2
YLR372W	253.318	1.64192	0.12665	12.9558	2.17867e-38	2.72736e-37	ELO3
YHR008C	1889.22	1.1792	0.0911514	12.9391	2.70944e-38	3.38523e-37	SOD2
YIL118W	712.36	1.14181	0.0883174	12.9272	3.16023e-38	3.94082e-37	RHO3
YNL151C	312.456	1.67677	0.129823	12.9078	4.06511e-38	5.05941e-37	RPC31
YJR149W	138.903	-1.58997	0.123125	-12.8994	4.53875e-38	5.63802e-37	NA
YJR091C	1662.4	-1.01374	0.0786519	-12.8887	5.21173e-38	6.46154e-37	JSN1
YDL105W	86.7384	1.86737	0.144646	12.8547	8.09645e-38	1.00188e-36	NSE4
YER160C	3107.45	-2.17731	0.169757	-12.8275	1.14943e-37	1.41419e-36	NA
YGL093W	274.184	1.31677	0.102622	12.8241	1.20149e-37	1.47542e-36	SPC105
YNL293W	224.378	-1.04852	0.0817418	-12.8229	1.2205e-37	1.49593e-36	MSB3
YPL230W	615.696	-1.47139	0.114818	-12.8148	1.3549e-37	1.65436e-36	USV1
YJR009C	1946.77	-1.64782	0.128864	-12.7867	1.94441e-37	2.36521e-36	TDH2
YER087C-B	894.166	1.27762	0.100342	12.7317	3.94131e-37	4.7406e-36	SBH1
YML128C	2141.1	-1.65436	0.130225	-12.7052	5.53052e-37	6.63971e-36	MSC1
YDR043C	606.368	-1.70582	0.134562	-12.6743	8.20978e-37	9.838e-36	NRG1
YML060W	91.3161	2.20154	0.173306	12.6369	1.32117e-36	1.58026e-35	OGG1
YDL183C	49.288	-2.50899	0.196907	-12.6142	1.76323e-36	2.10509e-35	NA
YHR029C	70.623	-2.67228	0.211072	-12.582	2.65357e-36	3.16221e-35	YHI9
YER053C-A	58.8085	-4.71132	0.35147	-12.5764	2.8455e-36	3.38468e-35	NA
YHR195W	423.175	-1.12529	0.0894755	-12.5743	2.92508e-36	3.47293e-35	NVJ1
YMR045C	1509.44	-1.3794	0.109756	-12.5701	3.08367e-36	3.65449e-35	NA
YFL008W	524.294	1.66225	0.132214	12.5678	3.17531e-36	3.75619e-35	SMC1
YJR119C	284.503	-1.67504	0.133386	-12.5525	3.85226e-36	4.54031e-35	JHD2
YNR034W	115.314	-1.74592	0.139078	-12.5326	4.95321e-36	5.82725e-35	SOL1
YPL223C	1246.23	-1.73756	0.138813	-12.5242	5.50597e-36	6.46575e-35	GRE1
YKL106W	338.605	-1.00541	0.0803455	-12.5113	6.47942e-36	7.59506e-35	AAT1
YLR216C	1013.91	-1.25558	0.100628	-12.4767	1.00019e-35	1.16815e-34	CPR6
YGR239C	776.602	-1.09881	0.0880946	-12.4719	1.06221e-35	1.23835e-34	PEX21
YBR243C	334.937	1.44819	0.116509	12.4248	1.91675e-35	2.22253e-34	ALG7
YNL229C	946.011	-1.05249	0.0851049	-12.3661	3.98768e-35	4.59082e-34	URE2
YMR078C	217.512	1.87412	0.151427	12.3622	4.18757e-35	4.80378e-34	CTF18
YOR120W	274.981	-1.90961	0.154384	-12.3622	4.18627e-35	4.80378e-34	GCY1
YOR108W	670.406	-1.25179	0.101378	-12.3461	5.11174e-35	5.84315e-34	LEU9
YFL045C	323.074	1.81508	0.146979	12.3442	5.23647e-35	5.97514e-34	SEC53
YJL072C	508.119	-1.20665	0.0978197	-12.3331	6.01154e-35	6.83535e-34	PSF2
YMR095C	28.5166	-4.69471	0.330685	-12.3326	6.0488e-35	6.8656e-34	SNO1
YBR169C	3423.87	-1.63066	0.132341	-12.3223	6.87245e-35	7.78676e-34	SSE2
YDL049C	218.215	1.35803	0.110213	12.3184	7.21174e-35	8.15686e-34	KNH1
YDL102W	635.378	1.00588	0.0817342	12.3061	8.40192e-35	9.46979e-34	POL3
YOR185C	357.27	-1.60621	0.130521	-12.3034	8.68825e-35	9.77542e-34	GSP2
YLR089C	800.774	-1.36674	0.111125	-12.2983	9.24813e-35	1.03872e-33	ALT1
YNR049C	529.987	-1.20332	0.0979436	-12.2839	1.10487e-34	1.2388e-33	MSO1
YHR122W	188.268	-1.4838	0.120966	-12.258	1.52139e-34	1.70285e-33	CIA2
YKL160W	836.632	1.41263	0.115266	12.2535	1.6091e-34	1.7979e-33	ELF1
YDL192W	1463.29	1.23069	0.100504	12.2449	1.78827e-34	1.98776e-33	ARF1
YPL208W	231.205	1.18842	0.0970334	12.242	1.8545e-34	2.05783e-33	RKM1
YJL137C	385.268	-1.1098	0.0906923	-12.2349	2.02335e-34	2.24133e-33	GLG2
YGL156W	473.352	-1.40901	0.115318	-12.2183	2.48193e-34	2.7399e-33	AMS1
YLR130C	661.986	-1.00062	0.0820247	-12.1984	3.16859e-34	3.49195e-33	ZRT2
YGL016W	663.787	1.13371	0.0930009	12.1899	3.51677e-34	3.86905e-33	KAP122
YMR009W	198.697	-1.54326	0.1268	-12.1626	4.91905e-34	5.40257e-33	ADI1
YHR023W	1025.91	1.08277	0.0893692	12.1142	8.88759e-34	9.70647e-33	MYO1
YNL166C	616.726	1.52719	0.126152	12.1023	1.02721e-33	1.11865e-32	BNI5
YGL101W	515.21	-1.03812	0.086077	-12.0587	1.74425e-33	1.88678e-32	NA
YBR119W	165.835	-1.359	0.11283	-12.0369	2.27467e-33	2.45641e-32	MUD1
YCR107W	123.236	-1.26388	0.105312	-11.9908	3.97172e-33	4.27474e-32	AAD3
YOL147C	234.629	1.24805	0.104143	11.9797	4.54061e-33	4.87076e-32	PEX11
YKL072W	171.955	-1.06041	0.0884907	-11.9778	4.64538e-33	4.97488e-32	STB6
YBR030W	316.068	1.05544	0.0881579	11.9703	5.08199e-33	5.43344e-32	RKM3
YGL236C	479.822	-1.23262	0.103013	-11.9642	5.46983e-33	5.83841e-32	MTO1
YBR162C	1142.31	1.36037	0.113721	11.9611	5.68261e-33	6.0555e-32	TOS1
YGL051W	48.6862	-2.89115	0.239429	-11.9399	7.33363e-33	7.78911e-32	MST27
YBR029C	273.025	1.53267	0.128599	11.9143	9.97349e-33	1.05755e-31	CDS1
YLR304C	3985.66	1.18682	0.0997136	11.9027	1.14578e-32	1.21295e-31	ACO1
YOR385W	291.691	-1.08601	0.0913155	-11.8907	1.32279e-32	1.39804e-31	NA
YJR030C	193.01	1.6129	0.135767	11.8678	1.74057e-32	1.83657e-31	RBH2
YHR031C	316.39	1.06924	0.0901617	11.8559	2.00624e-32	2.11343e-31	RRM3
YHR096C	359.947	-2.14622	0.180965	-11.8549	2.02871e-32	2.13362e-31	HXT5
YOR247W	632.742	1.45343	0.123432	11.7715	5.47531e-32	5.73041e-31	SRL1
YHR199C	189.563	-1.27369	0.108384	-11.7465	7.36154e-32	7.66719e-31	AIM46
YMR169C	7078.83	-1.58328	0.13548	-11.6887	1.45525e-31	1.50353e-30	ALD3
YCR065W	1004.9	1.16524	0.0997389	11.6818	1.5786e-31	1.62836e-30	HCM1
YOL090W	205.979	1.20904	0.103525	11.6724	1.76352e-31	1.8162e-30	MSH2
YJL118W	246.795	2.15654	0.184594	11.6664	1.89328e-31	1.94054e-30	NA
YBR205W	449.891	1.08432	0.0929444	11.6655	1.91324e-31	1.95789e-30	KTR3
YBR215W	434.543	1.00887	0.0866442	11.6414	2.53961e-31	2.59065e-30	HPC2
YOR142W-B	6596.75	-1.27719	0.109811	-11.6305	2.88448e-31	2.93779e-30	NA
YLR174W	136.35	-1.42301	0.12231	-11.6241	3.10677e-31	3.1592e-30	IDP2
YJL170C	96.4796	-1.75527	0.150851	-11.6133	3.52869e-31	3.58259e-30	ASG7
YOL069W	231.2	1.0929	0.0945034	11.5579	6.73064e-31	6.812e-30	NUF2
YDR133C	105.212	-1.73303	0.150295	-11.5105	1.16739e-30	1.17597e-29	NA
YOL110W	336.998	1.26469	0.109937	11.5002	1.31654e-30	1.32208e-29	SHR5
YEL009C	1084.65	-1.08339	0.0943504	-11.4821	1.62205e-30	1.62634e-29	GCN4
YJR104C	2393.59	1.11899	0.097937	11.4273	3.05604e-30	3.04989e-29	SOD1
YML058W	180.029	1.54526	0.135137	11.4235	3.1904e-30	3.17906e-29	SML1
YNL195C	96.4444	-2.73811	0.237518	-11.3918	4.5916e-30	4.56822e-29	NA
YML101C	358.409	1.44411	0.126757	11.3885	4.77217e-30	4.74055e-29	CUE4
YOR201C	110.949	-1.45552	0.128029	-11.3552	6.98412e-30	6.91653e-29	MRM1
YJR043C	275.623	1.06194	0.0936267	11.3375	8.55744e-30	8.44867e-29	POL32
YJL016W	370.193	-1.29816	0.11451	-11.3354	8.76647e-30	8.64181e-29	TPH3
YPL227C	310.828	1.2919	0.114206	11.3067	1.21608e-29	1.19331e-28	ALG5
YDL156W	170.034	1.14738	0.101427	11.3047	1.24367e-29	1.21854e-28	CMR1
YOR315W	175.198	2.10898	0.186327	11.2979	1.34372e-29	1.31456e-28	SFG1
YCL027W	131.657	-1.45803	0.129809	-11.2208	3.22179e-29	3.14234e-28	FUS1
YDL135C	63.9916	2.27965	0.201458	11.2128	3.52777e-29	3.4304e-28	RDI1
YJL100W	189.96	-1.29845	0.115748	-11.2126	3.53468e-29	3.43194e-28	LSB6
YKL027W	542.1	1.09686	0.097986	11.1934	4.39115e-29	4.25711e-28	TCD2
YDR224C	887.445	1.09081	0.0976806	11.1657	5.99881e-29	5.78957e-28	HTB1
YCR106W	161.772	-1.43184	0.128267	-11.1554	6.73651e-29	6.47247e-28	RDS1
YER091C	7460.14	1.0445	0.0940336	11.1079	1.14842e-28	1.0985e-27	MET6
YOR217W	545.499	1.01362	0.0912759	11.1038	1.20282e-28	1.14882e-27	RFC1
YDR533C	1604.92	-1.50776	0.135863	-11.0977	1.28689e-28	1.22731e-27	HSP31
YMR251W	83.8141	-1.92092	0.172673	-11.0954	1.32091e-28	1.25789e-27	GTO3
YBL078C	211.112	-1.30204	0.11752	-11.0748	1.66315e-28	1.57681e-27	ATG8
YDR451C	314.388	1.2047	0.109031	11.0429	2.37264e-28	2.24617e-27	YHP1
YJL206C	266.6	-1.02974	0.093277	-11.0375	2.51948e-28	2.38169e-27	NA
YDL036C	118.25	1.34508	0.12172	11.0353	2.58201e-28	2.43461e-27	PUS9
YOL146W	133.44	1.83161	0.165665	11.0353	2.58302e-28	2.43461e-27	PSF3
YJR053W	165.546	1.34767	0.122014	11.0333	2.64085e-28	2.48549e-27	BFA1
YHL035C	691.015	-1.14181	0.103518	-11.0296	2.751e-28	2.58538e-27	VMR1
YCL001W	420.008	1.08671	0.0986583	11.0138	3.27838e-28	3.0676e-27	RER1
YMR312W	304.253	1.10884	0.101437	10.9288	8.39808e-28	7.82405e-27	ELP6
YIL004C	219.064	1.58446	0.144934	10.9235	8.90164e-28	8.28122e-27	BET1
YJR054W	142.248	1.4835	0.135789	10.9106	1.02608e-27	9.49086e-27	KCH1
YDL199C	139.203	-1.87159	0.171605	-10.8923	1.25428e-27	1.15519e-26	NA
YBL106C	477.013	-1.32277	0.121646	-10.8721	1.56522e-27	1.43952e-26	SRO77
YDR309C	263.68	1.75782	0.161787	10.8578	1.83076e-27	1.67655e-26	GIC2
YCR021C	230.684	-3.79202	0.347122	-10.8507	1.97985e-27	1.81051e-26	HSP30
YFR022W	573.627	-1.13333	0.104526	-10.8421	2.17435e-27	1.98556e-26	ROG3
YIL064W	101.185	1.93727	0.178224	10.838	2.27476e-27	2.07431e-26	EFM4
YGR110W	37.8572	-2.53735	0.23179	-10.8077	3.16344e-27	2.88061e-26	CLD1
YDR363W-A	1289.07	1.04745	0.0970417	10.793	3.71307e-27	3.37158e-26	SEM1
YLL046C	23.8354	-3.15633	0.28089	-10.7853	4.03878e-27	3.66217e-26	RNP1
YKL188C	119.99	-1.73051	0.160621	-10.7597	5.33556e-27	4.81096e-26	PXA2
YER145C	2086.69	1.44636	0.134657	10.7406	6.56181e-27	5.90014e-26	FTR1
YJR070C	302.819	1.11629	0.103969	10.735	6.97209e-27	6.25161e-26	LIA1
YBL035C	170.958	2.18431	0.203681	10.7039	9.75362e-27	8.73355e-26	POL12
YJL061W	458.664	1.09191	0.102143	10.6889	1.14735e-26	1.02451e-25	NUP82
YEL071W	2451.51	-1.0556	0.0988306	-10.6804	1.2571e-26	1.11786e-25	DLD3
YLR312C	213.66	-1.25491	0.117472	-10.6799	1.26428e-26	1.1227e-25	ATG39
YPR069C	233.328	1.58953	0.149171	10.6503	1.73723e-26	1.53845e-25	SPE3
YCR059C	175.617	-1.11155	0.10445	-10.638	1.98338e-26	1.75402e-25	YIH1
YDR307W	203.829	1.16494	0.109654	10.6196	2.41646e-26	2.13118e-25	PMT7
YPR061C	148.072	-1.73155	0.163005	-10.6115	2.63586e-26	2.3215e-25	JID1
YPL130W	35.4022	-4.18674	0.354127	-10.576	3.85128e-26	3.38272e-25	SPO19
YGR108W	330.394	1.41576	0.13399	10.5605	4.54476e-26	3.97558e-25	CLB1
YJL145W	193.86	1.36057	0.128821	10.5551	4.80929e-26	4.20129e-25	SFH5
YKR099W	2121.61	-1.19524	0.113378	-10.5414	5.56368e-26	4.84717e-25	BAS1
YGR099W	318.006	1.30511	0.124372	10.4898	9.62682e-26	8.33075e-25	TEL2
YBR295W	276.075	-1.03962	0.0991655	-10.4814	1.05192e-25	9.06645e-25	PCA1
YOR241W	188.943	1.1115	0.106319	10.4509	1.45207e-25	1.2482e-24	MET7
YCR048W	216.777	-1.21213	0.116064	-10.4404	1.62152e-25	1.392e-24	ARE1
YNL036W	949.366	-1.60517	0.153835	-10.432	1.77088e-25	1.5182e-24	NCE103
YML097C	358.043	-1.28732	0.123841	-10.3917	2.70548e-25	2.31023e-24	VPS9
YHR147C	234.228	1.17537	0.11314	10.3863	2.86339e-25	2.43861e-24	MRPL6
YLR132C	122.779	1.81065	0.174335	10.3672	3.49671e-25	2.97013e-24	USB1
YCR061W	283.468	-1.89854	0.183224	-10.357	3.88963e-25	3.28656e-24	NA
YKL055C	180.254	-1.10586	0.10697	-10.334	4.94515e-25	4.16206e-24	OAR1
YGR256W	962.4	-1.39005	0.134819	-10.3159	5.96972e-25	5.01784e-24	GND2
YOR161C	510.915	-1.36214	0.132108	-10.31	6.35111e-25	5.33146e-24	PNS1
YJL191W	724.504	1.13547	0.110247	10.2986	7.14928e-25	5.9859e-24	RPS14B
YEL033W	38.4008	-2.57988	0.247328	-10.28	8.6745e-25	7.2441e-24	MTC7
YCL048W	27.6453	-3.78232	0.346229	-10.2672	9.90086e-25	8.23624e-24	SPS22
YDL206W	366.157	-1.02057	0.0995182	-10.2541	1.13415e-24	9.41041e-24	NA
YNL008C	393.111	-1.45025	0.141418	-10.2526	1.15227e-24	9.54846e-24	ASI3
YEL039C	108.28	-2.60946	0.25356	-10.249	1.19603e-24	9.88568e-24	CYC7
YPL005W	165.921	-1.1835	0.115462	-10.2453	1.24204e-24	1.02397e-23	AEP3
YML067C	387.282	1.10857	0.108774	10.1909	2.17713e-24	1.78772e-23	ERV41
YCR007C	120.09	-1.2027	0.117943	-10.19	2.19869e-24	1.80114e-23	NA
YLR383W	227.446	1.5632	0.15352	10.1736	2.60124e-24	2.12281e-23	SMC6
YPL177C	569.026	-1.06261	0.1045	-10.168	2.75475e-24	2.24241e-23	CUP9
YDR518W	658.575	1.058	0.104352	10.1383	3.73692e-24	3.02283e-23	EUG1
YDR519W	93.4693	1.41743	0.139732	10.125	4.28048e-24	3.44953e-23	FPR2
YBL086C	374.15	-1.1192	0.110558	-10.1212	4.45033e-24	3.58193e-23	NA
YKL023W	417.997	-1.30104	0.128607	-10.1135	4.81432e-24	3.86525e-23	NA
YEL073C	197.765	2.35511	0.232605	10.1108	4.94949e-24	3.96883e-23	NA
YBR187W	194.413	1.07193	0.106419	10.0689	7.58317e-24	6.05808e-23	GDT1
YPL198W	776.826	1.10031	0.109536	10.0451	9.65792e-24	7.68699e-23	RPL7B
YDR418W	467.251	1.07541	0.107231	10.0294	1.13145e-23	8.98336e-23	RPL12B
YHL036W	172.998	-1.59581	0.159153	-10.0195	1.25185e-23	9.9148e-23	MUP3
YOL158C	112.467	-1.55327	0.155526	-9.97383	1.98423e-23	1.56386e-22	ENB1
YIR032C	62.4389	1.70082	0.169932	9.96567	2.1542e-23	1.69574e-22	DAL3
YBR009C	136.686	1.67442	0.167872	9.95766	2.33483e-23	1.83346e-22	HHF1
YCL063W	276.903	1.2633	0.127532	9.90032	4.14951e-23	3.22312e-22	VAC17
YKR104W	88.3881	-1.32602	0.134235	-9.86627	5.82905e-23	4.4952e-22	NA
YHR127W	78.6209	1.66595	0.168357	9.86368	5.98138e-23	4.60167e-22	NA
YNL055C	1656.92	1.11958	0.113539	9.86189	6.08933e-23	4.67356e-22	POR1
YHR087W	706.789	-1.70664	0.173281	-9.84984	6.86555e-23	5.26305e-22	RTC3
YKR004C	206.186	1.08079	0.109848	9.83628	7.85634e-23	5.99406e-22	ECM9
YHL020C	416.518	1.06445	0.10833	9.82535	8.75723e-23	6.66563e-22	OPI1
YMR253C	129.087	-1.38251	0.140946	-9.80141	1.11029e-22	8.41136e-22	NA
YJL168C	667.649	1.13478	0.116428	9.74549	1.92853e-22	1.45079e-21	SET2
YLR211C	72.7101	-1.42161	0.145636	-9.74462	1.94508e-22	1.46153e-21	ATG38
YBR160W	218.65	1.03577	0.106428	9.72744	2.30307e-22	1.72449e-21	CDC28
YJR092W	1013.84	1.2017	0.12384	9.70208	2.95415e-22	2.20688e-21	BUD4
YJR155W	438.638	-1.3695	0.141301	-9.68971	3.33487e-22	2.48554e-21	AAD10
YCR002C	463.307	1.16427	0.120428	9.66635	4.19043e-22	3.116e-21	CDC10
YDR454C	281.053	1.01876	0.105577	9.64839	4.99336e-22	3.70648e-21	GUK1
YGR023W	422.202	-1.52157	0.157672	-9.64834	4.99602e-22	3.70648e-21	MTL1
YPR004C	225.262	1.07535	0.111535	9.6392	5.4612e-22	4.04229e-21	AIM45
YIL107C	522.796	-1.19745	0.124255	-9.63626	5.62003e-22	4.15508e-21	PFK26
YLR059C	151.97	1.00007	0.103984	9.61358	7.00728e-22	5.16887e-21	REX2
YER079W	459.307	-1.32659	0.138399	-9.58413	9.32446e-22	6.85459e-21	NA
YLR193C	282.559	-1.10271	0.115056	-9.58213	9.50669e-22	6.97266e-21	UPS1
YHR067W	157.88	1.07441	0.112244	9.56953	1.07397e-21	7.85024e-21	HTD2
YDL101C	64.9361	1.83277	0.19098	9.55083	1.28661e-21	9.37261e-21	DUN1
YOL012C	104.758	1.44424	0.151167	9.53871	1.4462e-21	1.05115e-20	HTZ1
YNL225C	189.424	1.00129	0.104985	9.53115	1.55552e-21	1.12806e-20	CNM67
YFL030W	111.417	-1.54931	0.163685	-9.4539	3.26431e-21	2.34094e-20	AGX1
YLL022C	328.193	1.25433	0.132726	9.44683	3.49249e-21	2.49624e-20	HIF1
YEL045C	93.0942	-1.47361	0.155885	-9.44062	3.70566e-21	2.64567e-20	NA
YNL115C	827.172	-1.04581	0.110815	-9.43754	3.81635e-21	2.71868e-20	NA
YLL014W	388.093	1.18308	0.125422	9.43106	4.05954e-21	2.88236e-20	EMC6
YBR010W	1664.12	1.45794	0.154589	9.42967	4.11382e-21	2.91769e-20	HHT1
YNL141W	252.575	2.0406	0.216654	9.41359	4.79484e-21	3.38951e-20	AAH1
YMR251W-A	5357.6	-1.66404	0.176952	-9.40423	5.24149e-21	3.70119e-20	HOR7
YIL101C	1837.89	-1.14398	0.12169	-9.40139	5.38469e-21	3.79815e-20	XBP1
YOL108C	197.322	1.58404	0.168455	9.39516	5.71329e-21	4.02553e-20	INO4
YDL021W	317.108	-1.5752	0.167796	-9.38436	6.3299e-21	4.45512e-20	GPM2
YDR531W	213.23	-1.0487	0.111727	-9.38373	6.36804e-21	4.47707e-20	CAB1
YDR273W	61.7158	-1.90513	0.202391	-9.37997	6.59914e-21	4.63449e-20	DON1
YLL058W	147.61	-1.11062	0.11874	-9.35021	8.74768e-21	6.11011e-20	NA
YJR073C	319.867	1.4056	0.150852	9.32292	1.13177e-20	7.87962e-20	OPI3
YNR009W	166.128	1.12035	0.120215	9.31278	1.24531e-20	8.65144e-20	NRM1
YLR201C	168.045	-1.18866	0.127984	-9.28544	1.61045e-20	1.11401e-19	COQ9
YJR120W	232.946	1.10825	0.119388	9.28363	1.63801e-20	1.13186e-19	NA
YBR214W	915.679	-1.42297	0.153325	-9.28027	1.69056e-20	1.16692e-19	SDS24
YPR141C	336.038	1.41438	0.15339	9.21559	3.09558e-20	2.11635e-19	KAR3
YAR029W	26.096	-2.84206	0.300887	-9.18852	3.9829e-20	2.70862e-19	NA
YLR142W	80.0954	1.73722	0.188676	9.18104	4.26942e-20	2.90042e-19	PUT1
YIR005W	53.2423	-1.57457	0.171062	-9.17677	4.44224e-20	3.01464e-19	IST3
YIL152W	152.404	-1.09803	0.119608	-9.1756	4.49061e-20	3.04426e-19	NA
YGL214W	15.3665	-3.74426	0.374828	-9.15928	5.22441e-20	3.53429e-19	NA
YPR145C-A	110.718	-2.28749	0.249103	-9.15617	5.3773e-20	3.63391e-19	NA
YMR048W	63.1716	1.62648	0.178324	9.08589	1.02855e-19	6.90736e-19	CSM3
YBR230W-A	128.272	1.40776	0.154812	9.08379	1.04856e-19	7.01977e-19	NA
YHR022C	45.1348	-2.93924	0.318758	-9.07856	1.10023e-19	7.35806e-19	NA
YCR028C-A	191.181	1.00243	0.110507	9.07022	1.18772e-19	7.93499e-19	RIM1
YDR340W	515.375	-1.02961	0.113525	-9.06916	1.19939e-19	8.00461e-19	NA
YIL002W-A	199.413	1.23996	0.136839	9.05723	1.33799e-19	8.91119e-19	NA
YBL009W	139.917	1.60338	0.177151	9.03814	1.59362e-19	1.05918e-18	ALK2
YKL042W	142.222	1.30503	0.144878	8.99763	2.30642e-19	1.52978e-18	SPC42
YAR031W	31.0815	-2.28326	0.250389	-8.99505	2.3612e-19	1.5645e-18	PRM9
YAR028W	144.42	-1.35517	0.150694	-8.98793	2.51935e-19	1.66587e-18	NA
YDR469W	254.055	1.18513	0.132155	8.96195	3.18984e-19	2.09846e-18	SDC1
YLR092W	1819.21	-1.18431	0.132341	-8.94877	3.59473e-19	2.36e-18	SUL2
YKL049C	93.8921	1.18711	0.132477	8.94583	3.69156e-19	2.42111e-18	CSE4
YPL267W	35.6147	2.56404	0.282148	8.914	4.92227e-19	3.21519e-18	ACM1
YGL050W	115.386	1.36805	0.153649	8.89344	5.92461e-19	3.85429e-18	TYW3
YBR252W	144.015	1.32354	0.148762	8.88964	6.13068e-19	3.98432e-18	DUT1
YMR298W	179.101	1.18199	0.132946	8.88874	6.18071e-19	4.01279e-18	LIP1
YMR244C-A	185.553	1.0827	0.121776	8.8885	6.19372e-19	4.01719e-18	COA6
YFL034C-A	150.694	-1.18053	0.132905	-8.87809	6.80167e-19	4.40265e-18	RPL22B
YNL194C	78.8152	-1.88366	0.211816	-8.86319	7.7759e-19	5.02821e-18	NA
YDR140W	145.511	1.07417	0.12117	8.86038	7.97424e-19	5.15129e-18	MTQ2
YGR153W	22.3386	2.89444	0.31171	8.8498	8.76777e-19	5.64693e-18	NA
Q0085	320.464	-1.06633	0.1207	-8.83365	1.01316e-18	6.51229e-18	ATP6
YDR179C	53.5557	2.02765	0.228213	8.82578	1.08696e-18	6.97274e-18	CSN9
YHR061C	79.9372	1.74102	0.197398	8.7877	1.5265e-18	9.76324e-18	GIC1
YOR208W	301.664	-1.08936	0.123946	-8.78778	1.52546e-18	9.76324e-18	PTP2
YDR406W	1682.1	-1.06092	0.120792	-8.78339	1.58616e-18	1.01347e-17	PDR15
YGL061C	116.046	1.43613	0.163262	8.78153	1.6126e-18	1.02833e-17	DUO1
YLR311C	22.1039	-2.78123	0.305796	-8.77899	1.64955e-18	1.04878e-17	NA
YDR528W	171.088	1.6403	0.186994	8.76434	1.87871e-18	1.19096e-17	HLR1
YLR080W	136.417	-1.55136	0.176876	-8.76343	1.89399e-18	1.19947e-17	EMP46
YLR086W	703.48	1.15046	0.131433	8.75138	2.10768e-18	1.33218e-17	SMC4
YDR308C	141.986	1.15707	0.132324	8.73701	2.39354e-18	1.50695e-17	SRB7
YGR152C	169.837	1.52826	0.174802	8.73183	2.50582e-18	1.57456e-17	RSR1
YOR348C	558.537	1.65418	0.189671	8.72105	2.75626e-18	1.73024e-17	PUT4
YDR085C	374.542	-1.13563	0.130483	-8.70216	3.25635e-18	2.03822e-17	AFR1
YPR175W	166.673	1.80229	0.206869	8.70218	3.25561e-18	2.03822e-17	DPB2
YNL203C	54.8841	-1.36999	0.157311	-8.68784	3.69405e-18	2.30547e-17	NA
YFR014C	228.815	1.0449	0.12043	8.67987	3.96214e-18	2.4704e-17	CMK1
YDL121C	574.816	1.18318	0.136494	8.66704	4.43484e-18	2.75447e-17	NA
YKR060W	195.952	1.02171	0.11792	8.66048	4.69791e-18	2.91226e-17	UTP30
YGL037C	784.298	-1.43371	0.165606	-8.65727	4.83189e-18	2.99243e-17	PNC1
YIL003W	72.4539	-1.25831	0.145284	-8.64836	5.22448e-18	3.23246e-17	CFD1
YBR262C	338.807	-1.0292	0.119429	-8.61599	6.93393e-18	4.25338e-17	MIC12
YMR232W	84.1233	-1.19224	0.138348	-8.60941	7.3436e-18	4.49612e-17	FUS2
YBR250W	31.1161	-1.92395	0.221824	-8.60928	7.35237e-18	4.49722e-17	SPO23
YER146W	91.3546	1.21072	0.140703	8.59278	8.48903e-18	5.18265e-17	LSM5
YBR132C	228.105	-1.06939	0.124548	-8.58538	9.0538e-18	5.517e-17	AGP2
YDL157C	42.9765	1.88989	0.218594	8.57532	9.88142e-18	6.00429e-17	NA
YCL002C	242.568	1.08024	0.126071	8.56822	1.05095e-17	6.36795e-17	NA
YPR151C	45.5724	-1.77829	0.206613	-8.56436	1.08674e-17	6.56626e-17	SUE1
YNL086W	72.5498	-1.43081	0.16713	-8.54594	1.27494e-17	7.68181e-17	SNN1
YOR021C	256.839	1.03701	0.121351	8.54245	1.31402e-17	7.90252e-17	SFM1
YDR171W	1366.21	-2.06426	0.241838	-8.53425	1.41065e-17	8.47571e-17	HSP42
YDR204W	635.296	-1.01289	0.118885	-8.51967	1.60014e-17	9.56965e-17	COQ4
YPL018W	75.8858	1.37875	0.161646	8.51081	1.72718e-17	1.03008e-16	CTF19
Q0255	473.938	-1.17679	0.138446	-8.49982	1.89877e-17	1.12824e-16	NA
YDR516C	197.659	-1.32022	0.155319	-8.49709	1.94398e-17	1.15403e-16	EMI2
YCR100C	78.1657	-1.82379	0.214139	-8.49313	2.01148e-17	1.19191e-16	NA
YMR118C	33.3698	-2.84727	0.320021	-8.47871	2.27696e-17	1.34675e-16	SHH3
YOL048C	345.572	-1.36976	0.161906	-8.45845	2.70946e-17	1.5967e-16	RRT8
YOR321W	187.468	1.19761	0.141556	8.45808	2.71811e-17	1.60033e-16	PMT3
YFL042C	282.813	-1.18087	0.140252	-8.41763	3.84165e-17	2.25156e-16	LAM5
YJL102W	120.562	1.16788	0.138743	8.41456	3.94375e-17	2.3072e-16	MEF2
YJL153C	1232.79	1.25827	0.149805	8.4067	4.21706e-17	2.45817e-16	INO1
YGL147C	1257.11	1.12786	0.134165	8.4061	4.23871e-17	2.46856e-16	RPL9A
YNL062C	137.085	1.09815	0.13082	8.39051	4.84027e-17	2.81128e-16	GCD10
YML109W	274.499	1.38927	0.166657	8.33146	7.98492e-17	4.60454e-16	ZDS2
YDR257C	128.804	-1.13023	0.135774	-8.31946	8.83683e-17	5.0867e-16	RKM4
YOL017W	75.4465	1.4667	0.176593	8.28544	1.17669e-16	6.73724e-16	ESC8
YOR159C	80.0496	1.27754	0.154024	8.27989	1.23285e-16	7.05254e-16	SME1
YOL025W	179.691	-1.10138	0.133161	-8.26898	1.35113e-16	7.69501e-16	LAG2
YJR133W	102.147	1.40836	0.170305	8.26258	1.42557e-16	8.0975e-16	XPT1
YBR005W	81.5802	-1.21949	0.14794	-8.23469	1.80025e-16	1.01631e-15	RCR1
YHR137W	744.905	-1.66366	0.203789	-8.19919	2.42003e-16	1.35316e-15	ARO9
YHR110W	180.555	1.00837	0.123062	8.19209	2.5673e-16	1.43054e-15	ERP5
YIL156W-A	96.3383	1.13218	0.138076	8.1907	2.59721e-16	1.44471e-15	NA
YAL033W	90.4727	1.51967	0.185218	8.18892	2.63572e-16	1.46487e-15	POP5
YPL123C	505.785	-1.15737	0.141355	-8.18705	2.67711e-16	1.48531e-15	RNY1
YOL092W	119.952	-1.0182	0.1247	-8.16124	3.31592e-16	1.83029e-15	YPQ1
YML054C	125.337	-1.39575	0.171005	-8.15854	3.39097e-16	1.86851e-15	CYB2
YNL044W	44.7811	1.73798	0.211534	8.15716	3.4299e-16	1.88835e-15	YIP3
YGL075C	96.2715	1.24049	0.152215	8.13873	3.9944e-16	2.19352e-15	MPS2
YPL183W-A	715.437	1.06476	0.130879	8.13595	4.08734e-16	2.24074e-15	RTC6
YHR124W	100.685	-1.19968	0.147462	-8.12911	4.32471e-16	2.36684e-15	NDT80
YGL179C	226.006	-1.34394	0.165349	-8.12588	4.44143e-16	2.42734e-15	TOS3
YKL069W	51.9031	1.66937	0.20467	8.1174	4.76283e-16	2.5978e-15	NA
YPR009W	55.2155	1.38629	0.170617	8.09135	5.9006e-16	3.19405e-15	SUT2
YDR089W	236.28	1.0635	0.131777	8.0687	7.10522e-16	3.83646e-15	VTC5
YNL277W	546.076	-1.07048	0.132731	-8.06459	7.34844e-16	3.96447e-15	MET2
YMR250W	1275	-1.0505	0.130371	-8.0592	7.67947e-16	4.1396e-15	GAD1
YHL044W	81.9542	-1.59852	0.198166	-8.05543	7.92029e-16	4.26228e-15	NA
YOR304C-A	109.2	1.51714	0.188211	8.05001	8.27839e-16	4.45127e-15	BIL1
YGR142W	188.269	-1.27919	0.159291	-8.02707	9.98295e-16	5.34109e-15	BTN2
YLL007C	162.123	1.00279	0.125147	8.01209	1.12771e-15	6.01354e-15	LMO1
YGR059W	20.2309	-2.40432	0.295666	-7.98631	1.39035e-15	7.38961e-15	SPR3
YKR083C	100.804	1.16027	0.145507	7.96005	1.71968e-15	9.09497e-15	DAD2
YER030W	1242.75	1.36245	0.171599	7.93841	2.04783e-15	1.07687e-14	CHZ1
YCR005C	1335.69	-1.06108	0.133749	-7.9325	2.14779e-15	1.12851e-14	CIT2
YOR338W	186.101	-1.04257	0.131556	-7.92358	2.30774e-15	1.21058e-14	NA
YGL229C	248.755	-1.47568	0.186194	-7.92145	2.34766e-15	1.22952e-14	SAP4
YDR513W	453.132	-1.1	0.138946	-7.91747	2.424e-15	1.26847e-14	GRX2
YOR195W	449.21	1.23203	0.155603	7.91427	2.48713e-15	1.30045e-14	SLK19
YJL210W	124.268	-1.1923	0.150609	-7.91181	2.53668e-15	1.32528e-14	PEX2
YER032W	343.058	1.37441	0.173662	7.91077	2.55795e-15	1.33531e-14	FIR1
YBL063W	198.732	1.47182	0.186146	7.89938	2.80287e-15	1.45962e-14	KIP1
YBR194W	73.1128	1.32044	0.167069	7.88923	3.04066e-15	1.5809e-14	AIM4
YOL024W	17.8217	-2.43619	0.300124	-7.88449	3.15815e-15	1.6367e-14	NA
YPR060C	242.195	1.00838	0.128272	7.85883	3.87735e-15	2.00138e-14	ARO7
YLR336C	438.915	1.20276	0.15318	7.85012	4.15632e-15	2.14366e-14	SGD1
YOR114W	111.796	1.70672	0.217212	7.84172	4.44433e-15	2.28854e-14	NA
YBL010C	124.991	1.15494	0.147376	7.82847	4.93824e-15	2.53478e-14	NA
YOR173W	561.377	-1.49986	0.191915	-7.81657	5.42811e-15	2.7818e-14	DCS2
YOL084W	1540.42	-1.38526	0.17727	-7.81605	5.45081e-15	2.79121e-14	PHM7
YPL247C	757.149	-1.16609	0.149477	-7.80118	6.13332e-15	3.12828e-14	NA
YJL116C	497.393	-1.04662	0.134582	-7.78624	6.90312e-15	3.50704e-14	NCA3
Q0130	71.2023	-1.38828	0.178637	-7.76064	8.45047e-15	4.27295e-14	OLI1
YIL140W	449.268	1.52688	0.196858	7.75314	8.96507e-15	4.52606e-14	AXL2
YLR200W	310.38	1.3303	0.171636	7.74627	9.46276e-15	4.77359e-14	YKE2
YDL085W	179.345	-1.2684	0.163794	-7.74583	9.49618e-15	4.7867e-14	NDE2
YHR007C-A	321.4	-1.00902	0.130294	-7.74504	9.55492e-15	4.81254e-14	NA
YGR248W	172.612	-1.86194	0.240911	-7.7292	1.08225e-14	5.43824e-14	SOL4
YLR285W	115.498	1.05827	0.136903	7.72315	1.1349e-14	5.69395e-14	NNT1
YEL024W	204.694	-1.02075	0.132265	-7.7177	1.18451e-14	5.9382e-14	RIP1
YGL183C	71.6012	-1.50892	0.19513	-7.71393	1.21999e-14	6.10658e-14	MND1
YFL040W	13.9177	-3.24511	0.396865	-7.68022	1.58813e-14	7.90022e-14	NA
YMR003W	75.8052	1.40854	0.18304	7.67295	1.68088e-14	8.35513e-14	AIM34
YMR088C	106.239	1.11468	0.145288	7.66383	1.80471e-14	8.94997e-14	VBA1
YJR135W-A	185.285	1.38092	0.180199	7.66219	1.82784e-14	9.05774e-14	TIM8
YOL016C	762.234	-1.03679	0.135521	-7.64966	2.0151e-14	9.96268e-14	CMK2
YFL017C	53.0466	1.69513	0.220813	7.64326	2.11794e-14	1.04631e-13	GNA1
YDL204W	2138.17	-1.34258	0.176058	-7.63084	2.33221e-14	1.14777e-13	RTN2
YKR102W	84.1342	-2.01125	0.262907	-7.63044	2.33952e-14	1.15049e-13	FLO10
YHR100C	138.693	1.15214	0.151137	7.61892	2.55806e-14	1.25223e-13	GEP4
YJL160C	16.685	-2.28748	0.294127	-7.61741	2.58818e-14	1.26601e-13	PIR5
YDR125C	82.3438	-1.19905	0.157696	-7.5977	3.01435e-14	1.46447e-13	ECM18
YLR053C	45.1886	2.01064	0.263398	7.56972	3.74021e-14	1.80758e-13	NA
YGR188C	265.425	1.22282	0.161556	7.56482	3.88408e-14	1.8757e-13	BUB1
YJL144W	65.9844	-1.82784	0.241719	-7.54176	4.63683e-14	2.22921e-13	NA
YNL283C	869.573	1.12191	0.148915	7.53268	4.97085e-14	2.38268e-13	WSC2
YML042W	208.639	-1.02261	0.135814	-7.52995	5.07595e-14	2.42945e-13	CAT2
YDR501W	74.626	1.45161	0.192311	7.52749	5.17248e-14	2.47381e-13	PLM2
YKL144C	94.2121	1.13725	0.151266	7.51101	5.86707e-14	2.79978e-13	RPC25
YLR325C	5596.67	1.10305	0.147049	7.50115	6.3261e-14	3.01437e-13	RPL38
YML027W	421.745	1.69485	0.226357	7.48504	7.15274e-14	3.40071e-13	YOX1
YGR245C	1255.32	1.26124	0.168665	7.47686	7.61191e-14	3.61103e-13	SDA1
YBR120C	70.8817	1.38626	0.185216	7.47153	7.92667e-14	3.75759e-13	CBP6
YIL077C	118.209	-1.0363	0.138947	-7.45557	8.94832e-14	4.23567e-13	NA
YLL009C	267.682	1.05733	0.14184	7.45252	9.15718e-14	4.33136e-13	COX17
YOL132W	59.5803	-1.84085	0.246362	-7.44657	9.58006e-14	4.52142e-13	GAS4
YHR048W	34.0571	-1.75935	0.235121	-7.43916	1.01331e-13	4.77542e-13	YHK8
YMR175W	1168.19	-1.28588	0.173391	-7.42314	1.14377e-13	5.38241e-13	SIP18
YML022W	114.988	1.01248	0.136431	7.42104	1.16204e-13	5.4604e-13	APT1
YNL200C	361.639	-1.19307	0.161251	-7.39979	1.36398e-13	6.38603e-13	NNR1
YLL026W	6483.17	-1.33377	0.180364	-7.39579	1.40567e-13	6.57647e-13	HSP104
YDR223W	86.8049	-1.80896	0.245318	-7.36147	1.81902e-13	8.46732e-13	CRF1
YCR089W	354.563	-1.26275	0.171496	-7.36083	1.8277e-13	8.50155e-13	FIG2
YLL055W	54.8137	-1.54509	0.209698	-7.35158	1.95877e-13	9.10468e-13	YCT1
YDR503C	64.166	1.34774	0.183239	7.34251	2.09631e-13	9.72994e-13	LPP1
YLR385C	202.789	1.07469	0.146483	7.33428	2.22924e-13	1.03395e-12	SWC7
YCL048W-A	33.6202	-2.37698	0.315539	-7.33364	2.23981e-13	1.03811e-12	NA
YDL222C	125.47	-1.4235	0.194841	-7.30838	2.70377e-13	1.24331e-12	FMP45
YIL025C	13.363	-4.85993	0.448374	-7.28871	3.12935e-13	1.43492e-12	NA
YHR104W	1836.95	-1.06398	0.146225	-7.27693	3.41501e-13	1.56146e-12	GRE3
YJR048W	26.7683	2.02251	0.275833	7.19935	6.05017e-13	2.73915e-12	CYC1
YDR201W	113.693	1.56397	0.216931	7.19724	6.14422e-13	2.77977e-12	SPC19
YOR313C	30.5901	2.12451	0.291879	7.18997	6.48042e-13	2.92572e-12	SPS4
YNR070W	29.9438	-2.13838	0.296907	-7.13672	9.55812e-13	4.27332e-12	PDR18
YDR523C	28.8867	-2.02916	0.281892	-7.13477	9.69482e-13	4.33143e-12	SPS1
YOR054C	560.821	-1.07478	0.151348	-7.10088	1.23965e-12	5.51175e-12	VHS3
YER128W	61.0759	-1.41867	0.201077	-7.03981	1.92507e-12	8.46007e-12	VFA1
YIL159W	335.556	1.1119	0.158066	7.03352	2.01388e-12	8.83232e-12	BNR1
YDR381C-A	46.0487	-1.52049	0.216408	-7.00661	2.44166e-12	1.06866e-11	NA
YAR027W	269.538	-1.01634	0.145145	-7.00185	2.52597e-12	1.10257e-11	UIP3
YCR010C	21.8467	-2.16807	0.305428	-6.99933	2.57198e-12	1.12189e-11	ADY2
YBR183W	318.159	-1.37879	0.197356	-6.98487	2.85126e-12	1.24119e-11	YPC1
YOR373W	536.771	1.46373	0.20983	6.97323	3.09738e-12	1.3447e-11	NUD1
Q0275	235.857	-1.00178	0.14367	-6.97199	3.1249e-12	1.35574e-11	COX3
YPL278C	123.529	1.09633	0.15727	6.9659	3.26303e-12	1.41471e-11	NA
YGR221C	82.0585	1.3965	0.200216	6.9645	3.29577e-12	1.42699e-11	TOS2
YIL020C	82.0552	-1.11362	0.159787	-6.96171	3.36174e-12	1.45457e-11	HIS6
YKR012C	17.0974	-2.26383	0.318066	-6.94514	3.78093e-12	1.63376e-11	NA
YOR228C	53.0105	-1.51147	0.218456	-6.90425	5.04685e-12	2.17058e-11	MCP1
YML123C	44.8982	-1.80347	0.261598	-6.86663	6.57363e-12	2.80664e-11	PHO84
YMR198W	152.762	1.19051	0.173408	6.85869	6.94969e-12	2.96327e-11	CIK1
YBR144C	27.6946	-1.71831	0.249549	-6.83812	8.02399e-12	3.41457e-11	NA
YJL091C	45.1916	1.71421	0.25018	6.8197	9.12292e-12	3.87199e-11	GWT1
YDR218C	9.40145	-2.99244	0.405217	-6.81362	9.51716e-12	4.034e-11	SPR28
YFL002C	310.883	1.21842	0.180122	6.76239	1.3573e-11	5.70066e-11	SPB4
YDR059C	176.314	-1.17216	0.173592	-6.75218	1.45637e-11	6.10085e-11	UBC5
YHL021C	979.945	-1.2676	0.187756	-6.75167	1.46157e-11	6.11867e-11	AIM17
YDL024C	51.3254	-1.90146	0.284416	-6.6771	2.43711e-11	1.00912e-10	DIA3
YBR046C	112.931	-1.02536	0.154014	-6.65609	2.81205e-11	1.15694e-10	ZTA1
YER104W	80.741	1.17059	0.175843	6.64999	2.93112e-11	1.20357e-10	RTT105
YAL028W	152.296	-1.6272	0.245601	-6.62026	3.58558e-11	1.46028e-10	FRT2
YLR126C	25.7661	1.52281	0.228074	6.61289	3.7689e-11	1.53107e-10	NA
YOR049C	12.4964	-2.55245	0.371888	-6.60551	3.96148e-11	1.60728e-10	RSB1
YDL214C	43.151	-1.59785	0.242342	-6.57057	5.01228e-11	2.02597e-10	PRR2
YOR214C	16.7012	-2.77602	0.409183	-6.54812	5.82676e-11	2.34929e-10	SPR2
YIL131C	243.823	1.45236	0.222028	6.53574	6.32953e-11	2.54632e-10	FKH1
YNR044W	745.243	-1.11567	0.171536	-6.50236	7.9071e-11	3.15843e-10	AGA1
YDR254W	76.7544	1.21125	0.18652	6.48348	8.96295e-11	3.56913e-10	CHL4
YKR053C	48.0166	-1.19955	0.184907	-6.47554	9.44716e-11	3.75036e-10	YSR3
YPL033C	8.01309	-3.30182	0.448771	-6.47128	9.71756e-11	3.84823e-10	SRL4
YDR031W	67.0994	1.42215	0.219847	6.45883	1.05512e-10	4.17068e-10	MIX14
YPL272C	58.4955	-1.29782	0.200794	-6.45482	1.08345e-10	4.27219e-10	PBI1
YER044C-A	19.8578	-1.86149	0.286769	-6.42395	1.32784e-10	5.18822e-10	MEI4
YER053C	181.462	-1.31473	0.205028	-6.41258	1.43075e-10	5.57683e-10	PIC2
YGR236C	28.026	-1.91411	0.296212	-6.40161	1.53744e-10	5.97463e-10	SPG1
YOR383C	106.905	-1.14466	0.179267	-6.38239	1.74347e-10	6.76302e-10	FIT3
YML009C	190.098	1.06028	0.166922	6.35269	2.11585e-10	8.17307e-10	MRPL39
YPL111W	65.3964	-1.25961	0.198398	-6.34379	2.24175e-10	8.6284e-10	CAR1
YML108W	48.3456	1.15922	0.182855	6.32712	2.49773e-10	9.57933e-10	NA
YER060W-A	32.5797	-1.9573	0.307584	-6.3112	2.76887e-10	1.06003e-09	FCY22
YEL017W	67.6742	1.12951	0.178966	6.30097	2.95794e-10	1.12973e-09	GTT3
YBL028C	2020.08	1.02992	0.163971	6.28048	3.37531e-10	1.28609e-09	NA
YLR410W-B	881.89	-1.14687	0.182795	-6.27373	3.52508e-10	1.34078e-09	NA
YBL059C-A	104.61	1.04505	0.166852	6.26095	3.82646e-10	1.45284e-09	CMC2
YBR233W-A	103.897	1.01191	0.161782	6.24689	4.18716e-10	1.58419e-09	DAD3
YGL251C	93.329	-1.19032	0.190894	-6.23067	4.64455e-10	1.75005e-09	HFM1
YHR156C	60.8207	-1.03371	0.166234	-6.212	5.23135e-10	1.96427e-09	LIN1
YMR099C	69.2595	1.21474	0.195975	6.19702	5.75435e-10	2.15562e-09	NA
YMR179W	297.704	1.07552	0.174019	6.17748	6.51314e-10	2.43101e-09	SPT21
YDR384C	102.544	-1.36749	0.222172	-6.14991	7.75247e-10	2.87738e-09	ATO3
YOL104C	54.8321	-1.32481	0.215237	-6.14355	8.06989e-10	2.99175e-09	NDJ1
YBR012C	11.8253	-2.33898	0.368957	-6.13821	8.34562e-10	3.0922e-09	NA
YOL163W	21.023	-1.53505	0.249144	-6.11267	9.79799e-10	3.61785e-09	NA
YGL047W	39.7016	1.46043	0.238726	6.0963	1.08548e-09	3.99663e-09	ALG13
YMR074C	42.8848	1.26335	0.207047	6.08812	1.14244e-09	4.20155e-09	SDD2
YJR036C	39.0585	-1.38446	0.226976	-6.08141	1.19129e-09	4.36874e-09	HUL4
YOR339C	12.7453	-1.98473	0.319784	-6.06962	1.28215e-09	4.68862e-09	UBC11
YBR231C	83.2481	-1.19667	0.196944	-6.06851	1.29106e-09	4.71585e-09	SWC5
YLL002W	101.764	1.17463	0.193729	6.05538	1.4009e-09	5.08821e-09	RTT109
YMR103C	12.1247	-2.45237	0.389905	-6.04747	1.47136e-09	5.32915e-09	NA
YNL072W	323.993	1.43461	0.237082	6.04678	1.47771e-09	5.34912e-09	RNH201
YOR192C	23.2851	-1.73675	0.286365	-6.01569	1.79125e-09	6.44914e-09	THI72
YKL008C	85.6901	1.02192	0.170109	6.00814	1.8766e-09	6.7476e-09	LAC1
YFR017C	286.531	-1.03504	0.172383	-6.0056	1.90625e-09	6.85038e-09	IGD1
YBR264C	43.5693	1.11863	0.187327	5.95142	2.65823e-09	9.51033e-09	YPT10
YNR032C-A	48.6992	1.17576	0.197856	5.93009	3.02774e-09	1.08023e-08	HUB1
YER185W	43.1674	-1.38837	0.235011	-5.89223	3.81009e-09	1.35188e-08	PUG1
YLR445W	10.2715	-2.95376	0.469889	-5.88968	3.86941e-09	1.37217e-08	GMC2
YDR024W	12.0166	-2.30393	0.377083	-5.88838	3.89995e-09	1.38224e-08	FYV1
YMR322C	18.5806	-1.97198	0.332935	-5.8469	5.00819e-09	1.75859e-08	SNO4
YDR119W-A	38.7363	-1.74508	0.2977	-5.83186	5.48135e-09	1.91639e-08	COX26
YKL071W	50.66	-1.37019	0.235416	-5.81348	6.11855e-09	2.13108e-08	NA
YIL055C	125.758	-1.2897	0.224578	-5.73952	9.49442e-09	3.27154e-08	NA
YOR190W	10.8439	-2.00229	0.34356	-5.68667	1.29542e-08	4.43684e-08	SPR1
YBL031W	355.611	1.08345	0.190565	5.68246	1.32768e-08	4.53845e-08	SHE1
YFL013W-A	13.6492	-2.49116	0.414903	-5.67403	1.39474e-08	4.7576e-08	NA
YPL153C	126.707	1.47135	0.259381	5.66539	1.46694e-08	4.99597e-08	RAD53
YDR246W-A	54.1598	-1.51415	0.270566	-5.58057	2.39736e-08	8.06668e-08	NA
YDR018C	36.508	-1.36688	0.247188	-5.51957	3.39822e-08	1.12697e-07	NA
YJL089W	37.3022	-1.19804	0.216975	-5.51205	3.54671e-08	1.17561e-07	SIP4
YHR105W	62.7661	-1.0163	0.184336	-5.50978	3.59289e-08	1.18908e-07	YPT35
YBR293W	39.6563	-1.20474	0.219039	-5.49002	4.01889e-08	1.32627e-07	VBA2
YLL047W	5.11353	-3.08474	0.492351	-5.47638	4.34121e-08	1.42722e-07	NA
YNR071C	5.94164	-3.32547	0.489279	-5.47234	4.44143e-08	1.45868e-07	NA
YDR170W-A	38.9216	-1.14056	0.209853	-5.42407	5.82575e-08	1.89403e-07	NA
YLR251W	57.7759	-1.23464	0.228009	-5.41224	6.22427e-08	2.01648e-07	SYM1
YLR376C	29.8213	1.20903	0.222413	5.40629	6.43451e-08	2.08249e-07	PSY3
YOR298W	17.2814	-1.93277	0.353667	-5.38575	7.2142e-08	2.32666e-07	MUM3
YDR367W	41.4115	-1.15584	0.215059	-5.36533	8.07997e-08	2.59679e-07	KEI1
YOL114C	33.3072	1.32273	0.246349	5.34048	9.26983e-08	2.96589e-07	PTH4
YCR020C-A	32.6836	-1.11906	0.209422	-5.32949	9.84902e-08	3.1434e-07	MAK31
YPL209C	93.4611	1.09411	0.206255	5.29921	1.16306e-07	3.6774e-07	IPL1
YLR213C	39.3949	-1.60314	0.302356	-5.28276	1.2725e-07	4.01556e-07	CRR1
YAL054C	86.6603	-1.5054	0.287905	-5.22267	1.76358e-07	5.49e-07	ACS1
YPR030W	122.661	-1.20807	0.231839	-5.21305	1.85758e-07	5.76869e-07	CSR2
YMR011W	696.529	2.46284	0.485704	5.19139	2.08725e-07	6.45085e-07	HXT2
YLR036C	31.7084	1.2377	0.237703	5.18795	2.1262e-07	6.56496e-07	NA
YGL226C-A	42.2788	1.34537	0.260498	5.1533	2.55938e-07	7.84981e-07	OST5
YJR034W	123.441	1.07247	0.208234	5.1466	2.65248e-07	8.12376e-07	PET191
YIL008W	162.959	1.06181	0.207076	5.12305	3.00626e-07	9.16377e-07	URM1
YDR252W	23.0978	1.32771	0.25838	5.10218	3.35765e-07	1.02059e-06	BTT1
YMR084W	19.9712	-1.58303	0.311158	-5.04924	4.43574e-07	1.33507e-06	NA
YOR186W	18.1746	-1.80289	0.356982	-4.99846	5.77911e-07	1.72172e-06	NA
YOL014W	27.5323	-1.45044	0.28819	-4.99466	5.89394e-07	1.75431e-06	NA
YKL093W	50.1609	-1.16912	0.234809	-4.98474	6.20455e-07	1.84212e-06	MBR1
YHL037C	8.36429	-2.74618	0.511663	-4.98387	6.23264e-07	1.84914e-06	NA
YBR069C	163.41	-1.16503	0.236851	-4.9601	7.04581e-07	2.07797e-06	TAT1
YDR374W-A	28.4615	1.26753	0.257867	4.9016	9.50569e-07	2.77551e-06	WIP1
YGR087C	130.502	-1.27059	0.260745	-4.89682	9.74003e-07	2.84136e-06	PDC6
YGR066C	26.9169	-1.64493	0.335046	-4.89609	9.77644e-07	2.85069e-06	NA
YLR054C	13.2955	-1.63946	0.332493	-4.87132	1.10857e-06	3.21935e-06	OSW2
YHL022C	11.0572	-1.80972	0.365423	-4.85853	1.18261e-06	3.4282e-06	SPO11
YCL026C-A	11.4755	-2.14599	0.425412	-4.85526	1.20232e-06	3.48062e-06	FRM2
YIL099W	83.2197	-1.51345	0.311661	-4.85418	1.20886e-06	3.49485e-06	SGA1
YGR063C	28.908	-1.04379	0.215154	-4.83951	1.30161e-06	3.75123e-06	SPT4
YDR163W	201.676	-1.01362	0.209415	-4.83622	1.3233e-06	3.81204e-06	CWC15
YNL331C	107.595	-1.09447	0.22669	-4.82463	1.40262e-06	4.02792e-06	AAD14
YLL057C	60.4924	-1.97346	0.407753	-4.81718	1.45603e-06	4.17386e-06	JLP1
YHR175W-A	11.367	-1.67722	0.342377	-4.81548	1.46846e-06	4.20763e-06	NA
YGL249W	13.5718	-1.97221	0.402699	-4.80983	1.51055e-06	4.32247e-06	ZIP2
YFL019C	25.7437	-1.20836	0.250665	-4.80515	1.54639e-06	4.42109e-06	NA
YJL047C-A	15.3252	1.43918	0.296276	4.79552	1.62256e-06	4.63271e-06	NA
YBR285W	26.0341	-1.71063	0.357299	-4.77286	1.81627e-06	5.16065e-06	NA
YLR030W	21.393	-1.22512	0.255762	-4.7702	1.8404e-06	5.22458e-06	NA
YOL152W	19.0331	-2.14838	0.445575	-4.7646	1.89232e-06	5.36726e-06	FRE7
YPR182W	30.386	1.09562	0.229431	4.75734	1.96163e-06	5.55652e-06	SMX3
YBL049W	24.5504	-1.55409	0.326486	-4.74294	2.1064e-06	5.95091e-06	MOH1
YMR085W	52.7123	-1.17375	0.247876	-4.72894	2.25695e-06	6.36785e-06	NA
YMR230W-A	1.98539	-2.87204	0.571246	-4.69764	2.63191e-06	7.38378e-06	NA
YEL028W	19.651	-1.40087	0.297491	-4.67849	2.88992e-06	8.069e-06	NA
YBL048W	14.7184	-1.75916	0.369762	-4.66041	3.15587e-06	8.79252e-06	RRT1
YOL157C	38.6704	-1.62365	0.350072	-4.60432	4.13815e-06	1.14207e-05	IMA2
YLR070C	66.5813	-1.10171	0.239488	-4.59958	4.23342e-06	1.16736e-05	XYL2
YNR034W-A	30.0447	-1.35917	0.295662	-4.59135	4.40384e-06	1.21176e-05	EGO4
YDL037C	44.5305	1.42262	0.313199	4.56773	4.93025e-06	1.35084e-05	BSC1
YMR063W	20.8322	-1.16092	0.259621	-4.45106	8.54472e-06	2.29916e-05	RIM9
YDR317W	12.2877	-1.48206	0.329803	-4.44558	8.76535e-06	2.35459e-05	HIM1
YOL166C	16.139	-2.06805	0.451439	-4.44032	8.98242e-06	2.4119e-05	NA
YOR050C	6.34268	-2.15742	0.463502	-4.41954	9.89091e-06	2.64592e-05	NA
YAR008W	56.065	1.43339	0.326242	4.37638	1.20666e-05	3.19742e-05	SEN34
YLL056C	25.2637	-1.40697	0.322511	-4.3423	1.40999e-05	3.71685e-05	NA
YDR534C	20.7794	-1.43628	0.329091	-4.33748	1.44123e-05	3.78941e-05	FIT1
YLL060C	89.3667	-1.22201	0.282846	-4.31815	1.57342e-05	4.12352e-05	GTT2
YGL258W-A	5.9148	-2.03602	0.44983	-4.30578	1.66397e-05	4.34843e-05	NA
YGL259W	16.206	-1.85138	0.424832	-4.30073	1.70238e-05	4.43983e-05	YPS5
YLR460C	29.648	-1.10438	0.257055	-4.28077	1.86246e-05	4.82606e-05	NA
YNL259C	30.9543	1.06608	0.249279	4.27079	1.94781e-05	5.03914e-05	ATX1
YGR215W	102.352	1.08978	0.255353	4.26403	2.00771e-05	5.18786e-05	RSM27
YLR112W	26.188	1.06339	0.248064	4.26117	2.03357e-05	5.25046e-05	NA
YDL184C	1468.37	1.14834	0.27011	4.24938	2.14365e-05	5.51921e-05	RPL41A
YER068C-A	2.92926	-2.63088	0.532006	-4.19924	2.67808e-05	6.81895e-05	NA
YMR252C	21.2472	-1.10444	0.262952	-4.18946	2.79624e-05	7.08901e-05	NA
YER175W-A	7.52211	-1.80453	0.419317	-4.1782	2.93826e-05	7.4199e-05	NA
YLR411W	23.245	-1.01306	0.245784	-4.11019	3.95332e-05	9.84055e-05	CTR3
YER039C-A	13.6036	-1.48548	0.358599	-4.10285	4.081e-05	0.000101409	NA
YGR109C	17.0575	1.68135	0.406065	4.1028	4.08186e-05	0.000101409	CLB6
YGL168W	4.6034	-2.14041	0.487019	-4.08991	4.31547e-05	0.000106802	HUR1
YGL205W	23.5487	-1.66539	0.409887	-4.05365	5.04238e-05	0.000123841	POX1
YLL025W	14.3675	-1.65907	0.404544	-4.04727	5.1819e-05	0.000127026	PAU17
YNL093W	27.8726	-1.20648	0.298828	-4.03705	5.41277e-05	0.000132333	YPT53
YJR156C	45.6686	-1.16088	0.287437	-4.03578	5.44212e-05	0.000133	THI11
YIL028W	6.23074	-1.893	0.452877	-4.02445	5.71097e-05	0.000139043	NA
YLR285C-A	7.85547	-1.88971	0.456553	-4.0199	5.82227e-05	0.000141539	NA
YGL258W	4.64555	-2.26445	0.521633	-4.01427	5.96307e-05	0.000144744	VEL1
YNR060W	32.346	-1.57311	0.390366	-4.0027	6.26239e-05	0.000151553	FRE4
YHR157W	9.41875	-1.62187	0.402871	-3.96312	7.39761e-05	0.000177559	REC104
YAL037C-B	8.29949	-1.73301	0.428573	-3.95419	7.67932e-05	0.000183773	NA
YPL171C	18.8999	-1.47461	0.37209	-3.93969	8.15859e-05	0.000194665	OYE3
YOR100C	10.3323	-1.73242	0.434136	-3.92812	8.56125e-05	0.000203669	CRC1
YMR059W	9.4085	-1.47657	0.37611	-3.871	0.00010839	0.00025494	SEN15
YNL196C	5.82053	-2.1687	0.530759	-3.86153	0.000112678	0.000264351	SLZ1
YKL221W	6.08687	-1.83036	0.45428	-3.85523	0.000115621	0.000271157	MCH2
YLR453C	38.6473	-1.00946	0.263182	-3.83284	0.000126673	0.000295892	RIF2
YOR381W-A	12.0228	-1.77652	0.459126	-3.76678	0.00016537	0.000381718	NA
YDR169C-A	4.5468	-1.99327	0.49861	-3.75044	0.000176522	0.000406007	NA
YNL215W	63.5358	-1.17023	0.311238	-3.74899	0.000177549	0.000408223	IES2
YMR292W	14.4792	1.22991	0.326307	3.74599	0.000179681	0.000412683	GOT1
YIL086C	11.7702	-1.50033	0.398964	-3.73063	0.000191004	0.000437598	NA
YIL057C	5.18265	-2.39481	0.568454	-3.7166	0.000201918	0.000460965	RGI2
YHR014W	5.45912	-1.7835	0.463099	-3.71339	0.000204501	0.000466201	SPO13
YMR107W	30.9742	-1.19044	0.320886	-3.71192	0.000205691	0.000468583	SPG4
YER039C	6.50307	-1.61172	0.422087	-3.7118	0.000205793	0.00046865	HVG1
YOL047C	15.8542	-1.20816	0.3241	-3.70836	0.00020861	0.000474394	LDS2
YDR401W	9.06485	-1.67906	0.445256	-3.70137	0.000214442	0.000486286	NA
YOR102W	5.7606	-2.10706	0.513417	-3.66922	0.00024329	0.000549192	NA
YOR177C	15.2614	-1.13768	0.308497	-3.66876	0.000243732	0.000549997	MPC54
YPR201W	37.9191	-1.22351	0.334573	-3.64754	0.000264764	0.000595324	ARR3
YLR361C-A	37.598	1.01602	0.278177	3.64271	0.000269783	0.000605392	NA
YIL072W	8.19775	-1.6633	0.450238	-3.63285	0.00028031	0.000627269	HOP1
YIL160C	44.999	-1.60023	0.453234	-3.62476	0.000289225	0.000646544	POT1
YFL020C	6.27379	-1.71539	0.460293	-3.61558	0.000299672	0.000668738	PAU5
YHR184W	12.8136	-1.07306	0.296029	-3.60791	0.000308676	0.000688116	SSP1
YJL211C	6.59961	-1.89338	0.506817	-3.60281	0.000314795	0.000701032	NA
YBR018C	6.45974	-1.66115	0.44966	-3.59984	0.000318412	0.000708352	GAL7
YLR164W	15.3157	-1.12914	0.315576	-3.56126	0.000369083	0.000815448	SHH4
YKL169C	3.55438	-1.98945	0.517539	-3.55842	0.000373093	0.00082318	NA
YOL159C	22.4774	-1.01293	0.284432	-3.55168	0.000382775	0.000842811	CSS3
YHR054C	17.4069	-1.09986	0.499081	-3.53278	0.00041122	0.0009039	NA
YOR392W	5.57097	-1.66552	0.459541	-3.51361	0.000442059	0.000966414	NA
YDR402C	5.93121	-2.0141	0.540784	-3.5037	0.000458836	0.00100072	DIT2
YFR023W	11.25	-1.10575	0.313833	-3.50233	0.000461212	0.00100556	PES4
YBR186W	12.607	-1.5607	0.445569	-3.46648	0.000527323	0.00114082	PCH2
YMR256C	345.658	1.02822	0.299703	3.43918	0.000583487	0.00125727	COX7
YLR346C	14.31	-1.59934	0.461006	-3.42921	0.000605334	0.0013026	CIS1
YPR150W	5.36585	-1.78534	0.503665	-3.42895	0.000605924	0.00130343	NA
YBR297W	28.5703	-1.09495	0.320607	-3.41091	0.000647469	0.00138771	MAL33
YMR323W	33.8399	-1.75997	0.507447	-3.38405	0.000714247	0.00152526	ERR3
YIL029C	9.15699	-1.48436	0.433481	-3.3714	0.000747874	0.00159179	NA
YOL162W	4.80944	-1.74284	0.497604	-3.36168	0.000774691	0.00164561	NA
YNL270C	10.42	-1.65075	0.480275	-3.36076	0.000777294	0.0016491	ALP1
YLR037C	8.25826	-1.68502	0.490039	-3.34637	0.000818784	0.0017347	PAU23
YER046W-A	5.0533	-2.0202	0.563962	-3.31842	0.000905267	0.00190416	NA
YLR031W	4.76014	-1.67944	0.490831	-3.31265	0.000924151	0.00194008	NA
YPR007C	11.9911	-1.29369	0.388524	-3.30843	0.00093821	0.0019664	REC8
YGL235W	33.6173	-1.51108	0.448899	-3.29582	0.000981351	0.00205296	NA
YPL241C	13.7826	1.02798	0.310772	3.27597	0.00105301	0.00219204	CIN2
YMR315W-A	8.82537	-1.17764	0.356068	-3.26926	0.00107829	0.00224019	NA
YBR056W-A	14.7231	-1.09236	0.333393	-3.2617	0.00110746	0.00229798	NA
YIL172C	48.0695	-1.08638	0.332486	-3.25035	0.00115263	0.00238097	IMA3
YFL041W-A	6.51558	-1.44843	0.441451	-3.21857	0.0012883	0.0026468	NA
YKL187C	26.7373	-1.62717	0.492827	-3.21805	0.00129066	0.00265082	FAT3
YIL134C-A	3.84529	-1.84256	0.545488	-3.21188	0.00131869	0.0027032	NA
YBR027C	3.95554	-1.72309	0.51374	-3.19752	0.00138616	0.0028352	NA
YPL192C	8.52424	-1.153	0.356091	-3.19525	0.00139711	0.00285489	PRM3
YDR182W-A	2.93446	-1.92704	0.559072	-3.18432	0.00145097	0.00295557	NA
YHR136C	26.3747	-1.59976	0.49032	-3.15685	0.00159483	0.00322618	SPL2
YPL248C	80.376	-1.26311	0.397553	-3.15502	0.00160487	0.00324446	GAL4
YPR123C	6.5318	1.50139	0.469952	3.12792	0.00176045	0.00353902	NA
YOL099C	3.36015	-1.93385	0.575639	-3.08827	0.00201326	0.00400849	NA
YLR267W	10.3252	-1.21488	0.391817	-3.08019	0.00206872	0.00410689	BOP2
YGR064W	6.98655	-1.91915	0.568444	-3.0755	0.0021015	0.00416616	NA
YNL171C	1.19426	-1.86883	0.580595	-3.05462	0.00225346	0.00444283	NA
YDR366C	10.537	-1.35855	0.438394	-3.04919	0.00229457	0.0045156	NA
YJR095W	8.59206	-1.4802	0.480097	-3.04811	0.00230282	0.00453045	SFC1
YKL220C	38.0399	-1.00434	0.329329	-3.04222	0.00234837	0.00461303	FRE2
YIR019C	401.778	-1.16847	0.382869	-3.03001	0.00244548	0.00478774	FLO11
YFL053W	22.8938	-1.65249	0.531373	-3.0243	0.00249208	0.0048701	DAK2
